## RESEARCH ARTICLE

# Diversity of returnee executives' foreign experience and corporate social responsibility performance

Yunyu Wu<sup>1</sup>, Weiguo Zhang<sup>1,2</sup>, Hua Li<sup>1\*</sup>

**1** Department of Business Management, School of Economics and Business Administration, Chongqing University, Chongqing, People's Republic of China, **2** College of Economics and Management, Southwest University, Chongqing, People's Republic of China

\* [lihua\\_cba@cqu.edu.cn](mailto:lihua_cba@cqu.edu.cn)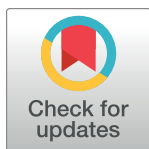**OPEN ACCESS**

**Citation:** Wu Y, Zhang W, Li H (2024) Diversity of returnee executives' foreign experience and corporate social responsibility performance. PLoS ONE 19(4): e0300262. <https://doi.org/10.1371/journal.pone.0300262>

**Editor:** Normaizatul Akma Saidi, Universiti Malaysia Kelantan, MALAYSIA

**Received:** June 12, 2023

**Accepted:** February 25, 2024

**Published:** April 1, 2024

**Peer Review History:** PLOS recognizes the benefits of transparency in the peer review process; therefore, we enable the publication of all of the content of peer review and author responses alongside final, published articles. The editorial history of this article is available here: <https://doi.org/10.1371/journal.pone.0300262>

**Copyright:** © 2024 Wu et al. This is an open access article distributed under the terms of the [Creative Commons Attribution License](https://creativecommons.org/licenses/by/4.0/), which permits unrestricted use, distribution, and reproduction in any medium, provided the original author and source are credited.

**Data Availability Statement:** The data are available through the databases described in the paper. The data underlying the results presented in the study are available from the RKS website (<http://www.rksratings.cn/>) and the CSMAR database (<http://www.csmar.cn/>)

## Abstract

Top managers' past experiences (e.g., foreign experience) significantly impact their decision-making behavior, which may influence firms' sustainable development. The available literature, focusing on the role of the increase in the number of top executives with foreign experience in corporate social responsibility (CSR), yields mixed results. In order to clarify the ambiguous relationship between executive foreign experience and CSR, we empirically examine the effect of the geographic diversity of top executives' foreign experience on CSR. Based on a hand-collected dataset of the top management team's (TMT's) foreign experience, we demonstrate the positive impact of the geographic diversity of returnee executives' foreign experience on firms' CSR using Chinese A-share listed firms from 2009 to 2018. Moreover, this impact is stronger in firms with political connections with the central government and in regions with good market development. Furthermore, the mechanism analysis shows that returnee executives drive firms' CSR by promoting corporate donations and green innovation. This paper offers clear policy implications by suggesting that hiring returnees with a broad geographic scope of foreign experience as corporate executives is an efficient way to enhance firms' CSR.

## Introduction

As a growing number of individuals return to their countries of origin after gaining education and/or work experience abroad, countries such as China and India are increasingly being depicted as experiencing a "brain gain" rather than a "brain drain" [1]. This form of cross-border mobility has stirred the curiosity of numerous international business scholars, leading to a boom in research on the role that returnees play in transforming the business environment in their home countries. Thus, a substantial body of literature has explored the impact of returnees on new venture creation [2–4] and technological innovation [1, 5]. Nevertheless, limited attention has been paid to the role of returnees in disseminating business practices focused on the social development (e.g., CSR) of their home countries.

[cndata1.csmar.com/#/index](http://cndata1.csmar.com/#/index)). Other data on political figures are available from <http://cpc.people.com.cn/> and <http://baike.baidu.com/>. Other economic data are from the publicly available China Statistical Yearbooks and The Five-Year Plans. The above data sources are open to all, and the authors of the present study do not have any special access rights or privileges that other researchers would not have. We also provide data for statistical analysis in the [Supporting information](#).

**Funding:** This study is supported by National Natural Science Foundation of China (grant numbers 72110107002). The funders had no role in study design, data collection and analysis, decision to publish, or preparation of the manuscript.

**Competing interests:** The authors have declared that no competing interests exist.

Corporate social responsibility (CSR) is generally defined as context-specific organizational actions and policies that account for stakeholder expectations and the triple bottom line of economic, social, and environmental performance [6]. In recent decades, academic research has increasingly focused on CSR and its determinants [e.g., 7–11]. Some scholars have recently directed their attention to the foreign experience of returnee executives with the emergence of the “brain gain” phenomenon. They observed that returnee executives’ foreign experience had a significant impact on CSR’s overall performance [12–16] and its components [17–21].

However, the existing literature regarding returnee executives and CSR produces mixed results. Research has shown that returnee executives benefit firms’ CSR initiatives [12], while it has been suggested that these executives’ foreign experiences hinder the company’s efforts in social action [20]. One explanation for the conflicting results may be that current research focuses solely on the number of returnees and fails to consider the impact of their foreign experience’ characteristics, such as geographic diversity. Geographic diversity represents the geographical scope of a returnee executive’s foreign experience and reflects the breadth and variety of their international knowledge and experience. Previous studies indicate that the variety of foreign exposure locations influences returnee executives’ decision-making behavior, thus resulting in distinct organizational consequences [22–24]. Consequently, geographic diversity may play a key role in elucidating the equivocal association between returnee executives and corporate social performance while comprehensively gauging their worth to firms.

To clarify this uncertain relationship, we investigated the effect of the diversity of returnee executives’ location on CSR using a panel of Chinese-listed companies from 2009 to 2018. Our findings reveal a positive relationship between geographic diversity and firms’ CSR based on ordinary least squares (OLS) regressions. This relationship is more substantial when the regions where firms operate have good market development and when firms have political connections with the central government. Furthermore, we employed a heteroskedasticity-based identification approach [25] to alleviate endogenous concerns. We conducted multiple robustness checks to validate our results. In addition, mechanism analysis indicates that having returnee executives from diverse geographic regions enhances firms’ CSR performance by facilitating corporate donations and promoting green innovations.

Our study makes several contributions to the current literature. First, this study adds to the literature on returnees and corporate social behavior. We investigated the role of foreign experience’ breadth, which is a departure from previous studies that merely focused on the number of returnees. Our findings help clarify the ambiguous relationship between returnees and corporate social action. Second, this paper enhances comprehension of international knowledge transfer’s organizational and institutional boundary conditions. In addition, this paper sheds light on the channel of returnee executives promoting corporate social development. Unlike previous studies concentrating on the direct impact of returnees on corporate sustainable development, this study reveals that returnee talents indirectly impact corporate social performance by promoting corporate donations and green innovations.

## Hypotheses development

### The geographic diversity of returnee executives’ foreign experience and CSR

Geographic diversity represents the geographical scope of returnee executives’ foreign experience, typically operationalized as the number of countries in which returnee executives have studied or worked abroad [22, 26]. The level of geographic diversity reflects, to some extent, the breadth and variety of returnee executives’ international experience and knowledge. We

argue that there is a positive relationship between the geographic diversity of returnee executives' foreign experience and firms' CSR performance.

At the individual level, returnee executives with a greater geographic diversity of foreign experience will develop more international knowledge and general competencies [22]. Countries vary in their economic, political, social and cultural systems, practices and behaviors. Studying and working in multiple countries exposes returnee executives to various manifestations of foreign environments, which furnishes them with knowledge and competencies transferable to different contexts. Moreover, international knowledge and competencies, especially those concerning CSR, gained from more countries are of greater value than those gained from fewer countries. In particular, knowledge and competencies derived from multiple countries generally involve a greater degree of causal ambiguity and social complexity [27]. In this vein, the CSR knowledge gained from multiple countries is more global and can be used across different countries rather than a single country [28]. In addition, a broad scope of foreign experience enhances returnee executives' general cognitive competencies, such as tolerance of difference, multiple worldviews, open-mindedness, and empathy [29–31]. With the enhanced knowledge and competencies described above, returnee executives with broad foreign experience can consider a wide range of solutions when approaching a CSR decision problem [22, 32] and recombine elements of their knowledge to create new insights and solutions [33–35].

At the TMT level, TMTs with a high geographic diversity of foreign experience can notice and interpret a broader range of environmental stimuli [26, 32, 34] and can make a higher-quality CSR decision, resulting in better CSR performance. As we mentioned above, TMTs with a broad scope of foreign experience are expected to have greater international knowledge and general competencies [22], thus, as well as have an enhanced ability to process complex and dynamic information [36]. They can also better understand the various CSR realities in the specific context of China, given their extensive knowledge base and diversified experience concerning CSR practices. As a result, TMTs with extensive foreign experience could potentially consider more alternatives when deciding on CSR, which is more likely to result in more comprehensive, higher-quality CSR decisions and, thus, better CSR performance. By comparison, TMTs with narrow foreign experiences are likely to have a restricted perspective and limited knowledge base from which to search for alternatives [37], especially when faced with an unprecedented problem concerning CSR.

In addition, high levels of geographic diversity can alleviate the risk of misapplying international knowledge to CSR decisions by the TMT with returnee executives. Because experiences from different countries are heterogeneous, there may be a risk that returnee executives erroneously transfer experiential knowledge gained in a host country to an experience or decision concerning the home country [38–40]. This risk is enhanced when returnee executives have a limited geographic scope of foreign experience. Furthermore, the limited scope of experience may hamper the TMT's ability to apply prior experiential knowledge when deciding on a CSR investment while increasing the risk of overconfidence [41]. Literature shows that managerial overconfidence negatively affects CSR activities [42]. However, the broad experience can enhance TMTs' awareness of cross-country differences [43] and help them discern what experiential knowledge they can and cannot draw on for a particular CSR decision. This helps avoid incorrect analogizing and erroneous transfer of prior learning [44, 45]. Based on the above analysis, we propose:

Hypothesis 1 (H1). The geographic diversity of returnee executives' foreign experience is positively related to firms' CSR.

## Moderators: Corporate political connections and regional market development

The ability of companies to integrate knowledge from multiple countries varies [46]. In this vein, the effect of the geographic diversity of returnee executives' foreign experience on CSR may be moderated by the organizational characteristic (e.g., corporate political connections) and institutional environment (e.g., regional market development) of the region where the firm is located.

**The moderating role of corporate political connections.** Political connections are commonplace in China and significantly influence firm behavior [47]. Political connections are broadly defined as connections between firms and government agencies or government officials [48]. Typically, Chinese firms build political connections by appointing former or current government bureaucrats as top executives [49]. The prior work experience of these executives serves as a channel of communication and access to existing government officials [50] and endows firms with inside information about government operations and bureaucracy [51]. Prior studies identify that political connections are an important determinant of firms' CSR involvement [52, 53]. In this paper, we contend that political connections magnify the effect of the geographic diversity of returnee executives' foreign experience on CSR.

Specifically, political connections compensate for the disadvantage of TMT with returnee executives by providing unique information advantages to the firm, thereby increasing the effectiveness of firms' CSR investments and improving CSR performance. Although much of the literature emphasizes the value of the human and social capital that returnee executives have accumulated abroad, they also have some drawbacks. In particular, returnee executives have usually lived abroad for a long time, and after returning, they may face a different environment [1] and lack local knowledge and domestic social networks [1, 54]. Therefore, they may not have an accurate understanding of the domestic market environment or access to information about social and political expectations [1, 54], resulting in a lack of sensitivity and knowledge to identify CSR priorities among multiple options. These disadvantages may make them less effective in providing practical advice and formulating a strategic CSR plan and action.

By contrast, politically connected executives are more likely to have local information and connections due to their prior work experience in government agencies. They can endow firms with inside information about government operations and bureaucracy [51] because their prior work experience serves as a key channel for communication and access to existing government agents [50]. In this sense, executives with political connections are better equipped to identify the salient concerns of key stakeholders in the Chinese context, such as the pressing issues facing politicians. In doing so, they aptly compensate for the aforementioned disadvantages of returnee executives by providing "political intelligence" to the firm, thereby increasing the TMT's sensitivity to salient social issues [55]. Therefore, politically connected executives help TMTs with returnee executives to identify CSR priorities among multiple options, thereby strengthening the effectiveness of their CSR investments. In sum, political connections promote the positive impact of returnee executives on CSR by creating an information advantage for the firm.

Hypothesis 2 (H2). Corporate political connections will strengthen the positive effect of the geographic diversity of returnee executives' foreign experience on CSR.

**The moderating role of regional market development.** While China has made major progress in marketization, the degree of that progress varies across regions [56]. In some

provinces, such as Zhejiang and Jiangsu, markets are more developed with limited government intervention [57]. As a result, firms have more autonomy and freedom in their operations. However, in regions with less developed market structures, the government still exerts considerable control over the economy [58]. Under such circumstances, firm behavior is heavily influenced by the government, a firm's managerial discretion is weakened, and the influence of top executives on firm outcomes is also constrained [59, 60]. We contend that the increased level of regional market development grants companies more managerial autonomy, thus amplifying the influence of returnee executives on CSR.

In more marketized regions, returnee executives have more managerial discretion and, thus, greater influence on firms' CSR. Generally, regions with a high level of marketization have a higher quality of market development and better legal infrastructure, such as rigorous contract enforcement and good property rights protection, rendering the distribution of social resources more equitable [49]. Good market development reduces government intervention in economic activities, contributes to market liberalization, and consequently increases the tendency of firms to conform to market rules in making management decisions. At the same time, the reduction of government intervention and the improvement of the market environment also decrease the external constraints on firms and increase their latitude of action [61]. Thus, in more market-oriented regions, TMTs with returnee executives have more managerial discretion and are more likely to spend resources on CSR practices based on their preferences and values [62].

In contrast, in less market-oriented regions with more government intervention and administrative harassment, returnee executives have relatively low managerial discretion and thus less influence on firms' CSR [49]. Low levels of market development expand the power of the government in economic activities and increase a firm's external constraints, thereby reducing firms' latitude of action. The upper-echelon literature shows that TMTs' characteristics are less likely to be expressed in the form of their actual actions when they lack managerial discretion [20, 63, 64]. Hence, in regions with low levels of market development, TMTs with returnee executives have a reduced role in management decisions, and their influence on corporate social responses is diminished. Therefore, we posit that the level of regional market development exerts a positive moderating influence on the relationship between the geographic diversity of returnee executives' foreign experience and firms' CSR.

Hypothesis 3 (H3). As the regional marketization level increases, the positive effect of the geographic diversity of returnee executives' foreign experience on firms' CSR will be enhanced.

## Methodology

### Data and sample

We selected Chinese-listed firms that disclosed CSR reports on the Shanghai or Shenzhen Stock Exchange from 2009–2018 and were included in Rankins CSR Rating (RKS) as the original sample. The sample starts from 2009 because the Shanghai and Shenzhen Stock Exchanges—both under the control of the central government—started requiring firms to report on their CSR performance in their annual reports in 2008. The sample ends in 2018 because, after that year, the outbreak of the COVID-19 epidemic led to a surge in CSR investment by Chinese companies. Following normal practice, we exclude (1) financially distressed firms, such as ST (special treatment) firms or negative-equity firms; (2) firms in the financial industry due to such firms' unique assets structure and accounting system; (3) firms with missing information on key variables. All continuous variables were winsorized at the 1st and 99th percentiles to

control for the effect of outliers. We ended up with an unbalanced sample of 776 unique firms for 4,844 firm-year observations.

CSR data were provided by RKS (<http://www.rksratings.cn/>), a third-party CSR rating agency in China and one of the main sources for ranking Chinese companies' CSR practices. Firm-level information was obtained from the China Stock Market and Accounting Research (CSMAR) database (<https://www.gtarsc.com/>). The CSMAR database is the main source for research on Chinese-listed firms, providing reliable information about companies' backgrounds and financial statistics, and has been widely used in management research. We manually collected data regarding senior executives' biographies based on their resumes disclosed in firms' annual reports. We double-checked that information against Sina Finance (<https://finance.sina.com.cn/>). Data concerning regional market development was obtained from the Marketization Index of China's Provinces: NERI Report 2021, co-authored by Wang et al. [58].

## Measurements

**Dependent variable.** We utilized the social responsibility scores provided by the RKS to measure a firm's CSR engagement (*CSR\_Score*), similar to studies that use the KLD (Kinder, Lydenberg, Domini & Co., Inc.) score as an indicator of CSR engagement for US firms [65, 66]. RKS adopts a structured expert scoring method, with a full score of 100. The higher the social responsibility score in the RKS, the better the firm's CSR performance. RKS data have been used extensively in CSR studies in China [52, 67–69] to measure firms' CSR performance. Validity tests of this measure, conducted by studies [70, 71], also suggest that the RKS data represent the substantive CSR performance of firms.

**Explanatory variable.** Returnee executives are defined as natives of mainland China who have studied or worked in developed regions, including developed countries and Hong Kong, Macau, and Taiwan provinces in China (See [S1 Table](#) for a detailed list), and then return to their home country as senior executives in domestic firms. With reference to prior studies [22, 26], we measure the geographic diversity of executive foreign experience as the average number of developed countries where returnee executives studied or worked abroad (*Geographic diversity*).

**Moderating variables.** We measured the regional market development (*MarketDev*) using the Marketization Index of China's Provinces: NERI Report 2021 [58]. Higher levels of marketization are associated with better regional market development and lower levels of government involvement.

Following previous studies [52, 72], we defined a company as politically connected if at least one of its directors or top managers has served as a government official in central or local government agencies. Thus, to measure firms' political connections, we first examined the CVs of all TMT and board members to determine whether they have worked in central or local government agencies. Given the differences in motivations, goals, and priorities [73, 74], we created two variables (i.e., *CentralPC* and *LocalPC*) to measure firms' political connections to the central and local governments, respectively [75, 76]. Central political connection (*CentralPC*) was measured as the number of TMT and board members who have held a national-level principal or deputy position. Local political connection (*LocalPC*) was measured as the number of TMT and board members who have served as local government officials at the division (*chu*) level or above. Notably, the hierarchy of local officials in China consists of ministry (*bu*), department (*ju*), division (*chu*), section (*ke*), staff member (*keyuan*), and clerk (*ban-shiyuan*) in descending order. Lower-level government officials, i.e., those below the level of division (*chu*), are not included in this study because they are not funded through the central

financial system and thus tend not to be counted as political elites in China [77].

$$Growth_{it} = MarketIndex_{it}/MarketIndex_{it-1} - 1$$

**Control variables.** Consistent with previous research, we included the conventional firm-level variables: return on assets, equity concentration, leverage, firm ownership, firm age, and firm size. To control for board-level governance effects, we also included a set of corporate governance variables: the board size, the percentage of independent directors on the board, whether the chairman and CEO are in one, and whether there are returnee directors. We also considered whether a company has female executives to control for the extent to which executive gender affects a company's CSR-related practices. We added the average age of the executive team members to control for the positive effect of executive age on CSR-related activities. Additionally, to control for the effect of foreign nationality, we accounted for whether a firm has a foreigner as an executive. Finally, we included *Industry* dummies to control for industry-specific effects and *Year* dummies to control for the omitted variables that vary over time but are constant across firms. All definitions of the dependent, explanatory, moderating, and control variables used in the analyses are presented in Table 1.

**Table 1. Definitions of variables.**

| Variable             | Definition                                                                                                                                                              |
|----------------------|-------------------------------------------------------------------------------------------------------------------------------------------------------------------------|
| CSR_Score            | CSR_Score is measured by the social responsibility scores provided by RKS. The detailed evaluation system is shown in S2 Table.                                         |
| Geographic diversity | The average number of developed countries where returnee executives studied or worked abroad.                                                                           |
| MarketDev            | MarketDev is measured by Marketization Index of China's Provinces: NERI Report 2018.                                                                                    |
| CentralPC            | The number of TMT and board members who have worked in central-level government agencies.                                                                               |
| LocalPC              | The number of TMT and board members who have served as local government officials at division (chu) level or above.                                                     |
| ROA                  | Net profit/average net assets. Where: average net assets = (number of owners' equity at the beginning of the year + number of owners' equity at the end of the year)/2. |
| Leverage             | Liabilities/assets.                                                                                                                                                     |
| Equity concentration | The sum of the shareholding ratios of the top ten shareholders.                                                                                                         |
| Firm size            | The natural logarithm of total assets.                                                                                                                                  |
| Firm age             | The number of years of listing.                                                                                                                                         |
| SOE                  | 1 = state-owned enterprises, 0 = non-state-owned enterprises                                                                                                            |
| Board size           | The total number of directors on the board.                                                                                                                             |
| Board independence   | The proportion of independent directors is computed as the number of independent directors divided by the total number of directors on the board.                       |
| Duality              | A binary variable equals 1 if the chairman and CEO are in one, otherwise 0.                                                                                             |
| Female executive     | A dummy variable is equal to 1 if there is a female in the TMT and 0 otherwise.                                                                                         |
| Executive age        | The average age of executive team members is calculated as the sum of the ages of all TMT members divided by the total number of TMT members.                           |
| Foreigner            | A binary variable takes the value of 1 if there is an executive with non-China (mainland) in the TMT and 0 otherwise.                                                   |
| Returnee director    | A dummy variable is equal to 1 if there is a director who has studied or worked outside (mainland) China in the board of directors and 0 otherwise.                     |

<https://doi.org/10.1371/journal.pone.0300262.t001>

## Estimation model

We tested our hypotheses with OLS multiple regressions using a dataset consisting of up to ten years of data for each firm. The estimation models are as follows:

$$CSR\_Score_{i,t+1} = \beta_0 + \beta_1 Geographical\ diversity_{i,t} + Controls_{i,t} + \varepsilon_{i,t} \quad (1)$$

$$CSR\_Score_{i,t+1} = \beta_0 + \beta_1 Geographical\ diversity_{i,t} + \beta_2 Geographical\ diversity_{i,t} \\ \times Political\ connections + \beta_3 Geographical\ diversity_{i,t} \times MarketDev_{i,t} \\ + Controls_{i,t} + \varepsilon_{i,t} \quad (2)$$

The subscript *i* denotes the firm; *t* denotes the year. Eq (1) is used to test Hypothesis 1, and Eq (2) is used to test Hypotheses 2 and 3. Where *CSR\_Score* is the dependent variable, *Geographical diversity* is the independent variable, and *Political connections* represent the corporate political connections with the central government (*CentralPC*) or local government (*LocalPC*). *MarketDev* represents the level of market development in the region where the company is located. *Controls* is a set of the firm- and executive-level control variables, and  $\varepsilon$  is an error term clustered at the firm level. The industry and year dummies are included to control for fixed industry-specific, time-varying characteristics. Accounting for the potential endogeneity of reverse causality, we lag one year between the dependent variable (*t* + 1) and the independent variables (*t*) in all estimations [78].

## Results

### Main results

Table 2 shows the firm-level data set used for the empirical analysis. The average value of *CSR\_Score* is 38.797, with a total score of 100 points, which does not reach 60, indicating that the overall quality of Chinese firms' CSR is poor. The standard deviation of CSR performance is as high as 12.07, showing that the level of social responsibility among firms is uneven and individual differences are enormous. The correlation matrix is reported in Table 3. We find that the geographic diversity of returnee executives' foreign experience is positively correlated with firms' CSR. All the correlations among the control variables are relatively low. Additionally, we calculate the variance inflation factor (VIF) for the control variables, and the highest VIF is 1.95, which is well below the critical value of 10. Therefore, multicollinearity is not a serious concern [79].

Table 4 shows the regression results for testing Hypotheses 1–3. Model 1 includes only the independent variable. Model 2 includes only the control variables. Model 3 includes the geographic diversity of returnee executives' foreign experience and all the control variables. We find that the coefficient of *Geographical diversity* is significantly positive. The results corroborate H1, postulating a positive relationship between the geographic diversity of returnee executives' foreign experience and firms' CSR.

In addition, we constructed three interaction terms (i.e., *Geographical diversity\*CentralPC*, *Geographical diversity\*LocalPC*, and *Geographical diversity\*MarketDev*) to test H2 and H3. The interaction term in Model 4 is significantly positive, suggesting that corporate political connections with the central government strengthen the effect of returnee executives on CSR. The interaction term in Model 5 is insignificant, indicating that corporate political connections with the local government do not significantly affect the relationship between the geographic diversity of returnee executives' foreign experience and CSR. Thus, H2 is partially supported.



Table 2. Descriptive statistics.

| Variables            | Mean   | Median | SD     | N    |
|----------------------|--------|--------|--------|------|
| CSR_Score            | 38.797 | 36.14  | 12.07  | 4844 |
| Geographic diversity | 0.220  | 0      | 0.543  | 4844 |
| MarketDev            | 7.784  | 7.94   | 1.721  | 4844 |
| CentralPC            | 0.275  | 0      | 0.62   | 4844 |
| LocalPC              | 2.425  | 2      | 2.436  | 4844 |
| ROA                  | 0.09   | 0.09   | 0.099  | 4844 |
| Leverage             | 0.497  | 0.51   | 0.196  | 4844 |
| Equity concentration | 58.89  | 59.07  | 16.288 | 4844 |
| Firm age             | 12.714 | 13     | 5.865  | 4844 |
| Firm size            | 23.043 | 22.9   | 1.42   | 4844 |
| Board size           | 10.755 | 10     | 2.769  | 4844 |
| Board independence   | 0.381  | 0.364  | 0.073  | 4844 |
| Duality              | 0.176  | 0      | 0.381  | 4844 |
| Female executive     | 0.585  | 1      | 0.493  | 4844 |
| Executive age        | 47.554 | 47.714 | 3.533  | 4844 |
| Foreigner            | 0.065  | 0      | 0.247  | 4844 |
| Returnee director    | 0.588  | 1      | 0.492  | 4844 |
| SOE                  | 0.648  | 1      | 0.478  | 4844 |

Note. The main characteristics of the executive-level data are reported in [S1 Table](#). Industry distribution of sample firms is reported in [S3 Table](#).

<https://doi.org/10.1371/journal.pone.0300262.t002>

These results echo some previous studies, which find that different levels of political connections play prominent but different roles in explaining firms' CSR-related practices [52, 72].

The interaction term in Model 6 is only significantly positive at the 10% level, which produces weak evidence for supporting H3. Thus, the positive effect of returnee executives on firms' CSR may be marginally strengthened as the level of regional marketization increases. Consistent with the view that institutional development reduces firms' external constraints and thus enhances their latitude of action [61, 80], this finding suggests that good institutional environment helps returnee executives to improve firms' CSR.

### Robustness checks

Endogeneity problem. Given the inability to find appropriate external instruments, we resort to a novel approach based on heteroskedasticity identification to alleviate the problem of reverse causality or omitted variable bias [25]. This approach does not require external instrumental variables but instead generates instruments from the existing model exploiting the heterogeneity in the error of the first-stage regression. The results in [Table 5](#) support the hypothesis that the geographic diversity of returnee executives' foreign experience positively impacts firms' CSR. In a non-tabulated analysis, we conducted White and Breusch-Pagan tests and affirmed the existence of heteroskedasticity. The Kleibergen-Paap rk LM statistic and the Hansen J test verify that the estimated results are not subject to under- and over-identification bias. The Cragg-Donald Wald F statistic is much larger than the Stock-Yogo critical value (at 10% maximum IV size), indicating that our estimation does not suffer from weak instruments. Overall, we present evidence that the main results are robust.

In addition, we re-examined the main hypotheses using several robustness checks. First, we used the number of developed countries involved in TMT's foreign experience (*Geographic diversity1*) as an alternative measure of the geographic diversity of returnee executives' foreign

**Table 3. Correlation matrix.**

| Variables               | (1)       | (2)       | (3)       | (4)       | (5)       | (6)       | (7)       | (8)       | (9)       |
|-------------------------|-----------|-----------|-----------|-----------|-----------|-----------|-----------|-----------|-----------|
| (1)CSR_Score            |           |           |           |           |           |           |           |           |           |
| (2)Geographic diversity | 0.203***  |           |           |           |           |           |           |           |           |
| (3)CentralPC            | 0.105***  | 0.129***  |           |           |           |           |           |           |           |
| (4)LocalPC              | 0.084***  | 0.041***  | 0.331***  |           |           |           |           |           |           |
| (5)MarketDev            | 0.192***  | 0.109***  | -0.032**  | -0.091*** |           |           |           |           |           |
| (6)ROA                  | 0.039***  | 0.012     | 0.125***  | 0.079***  | 0.068***  |           |           |           |           |
| (7)Leverage             | 0.121***  | 0.010     | 0.056***  | 0.073***  | -0.016    | -0.139*** |           |           |           |
| (8)Equity concentration | 0.275***  | 0.061***  | 0.126***  | 0.152***  | 0.092***  | 0.138***  | 0.018     |           |           |
| (9)Firm age             | 0.070***  | -0.032**  | -0.099*** | -0.147*** | 0.084***  | -0.090*** | 0.200***  | -0.288*** |           |
| (10)Firm size           | 0.485***  | 0.174***  | 0.246***  | 0.246***  | 0.122***  | 0.084***  | 0.503***  | 0.326***  | 0.191***  |
| (11)Board size          | 0.182***  | 0.052***  | 0.128***  | 0.241***  | -0.045*** | -0.054*** | 0.111***  | 0.089***  | 0.075***  |
| (12)Board independence  | 0.040***  | 0.025*    | 0.069***  | 0.106***  | 0.039***  | 0.032**   | 0.002     | 0.036**   | -0.066*** |
| (13)Duality             | -0.007    | 0.049***  | 0.021     | -0.072*** | 0.128***  | 0.038***  | -0.095*** | -0.030**  | -0.111*** |
| (14)Female executive    | 0.060***  | 0.065***  | -0.025*   | -0.033**  | 0.105***  | 0.042***  | -0.094*** | -0.081*** | 0.046***  |
| (15)Executive age       | 0.275***  | 0.043***  | 0.027*    | 0.101***  | 0.137***  | -0.079*** | 0.131***  | 0.158***  | 0.209***  |
| (16)Foreigner           | 0.080***  | 0.105***  | -0.008    | -0.065*** | 0.080***  | 0.037***  | -0.060*** | 0.038***  | -0.105*** |
| (17)Returnee director   | 0.189***  | 0.249***  | 0.074***  | 0.054***  | 0.191***  | 0.082***  | 0.011     | 0.145***  | -0.002    |
| (18)SOE                 | 0.131***  | -0.055*** | -0.007    | 0.173***  | -0.132*** | -0.107*** | 0.226***  | 0.114***  | 0.256***  |
| Variables               | (10)      | (11)      | (12)      | (13)      | (14)      | (15)      | (16)      | (17)      |           |
| (11)Board size          | 0.234***  |           |           |           |           |           |           |           |           |
| (12)Board independence  | 0.070***  | -0.074*** |           |           |           |           |           |           |           |
| (13)Duality             | -0.071*** | -0.071*** | 0.074***  |           |           |           |           |           |           |
| (14)Female executive    | -0.071*** | -0.031**  | 0.049***  | 0.101***  |           |           |           |           |           |
| (15)Executive age       | 0.353***  | 0.115***  | 0.030**   | -0.059*** | -0.131*** |           |           |           |           |
| (16)Foreigner           | -0.029**  | -0.007    | 0.036**   | 0.168***  | 0.024*    | 0.009     |           |           |           |
| (17)Returnee director   | 0.199***  | 0.166***  | 0.049***  | 0.023     | 0.050***  | 0.061***  | 0.109***  |           |           |
| (18)SOE                 | 0.300***  | 0.208***  | -0.105*** | -0.248*** | -0.138*** | 0.333***  | -0.178*** | -0.043*** |           |

Note. N = 4844.

\*\*\*, \*\*, \* represents p < 0.01, p < 0.05, and p < 0.1, respectively.

<https://doi.org/10.1371/journal.pone.0300262.t003>

experience. The results in Table 6 are similar to the previous analysis (See Table 4), indicating that TMTs with a larger scope of foreign experience significantly improve firms' CSR than those whose members have narrower foreign experiences.

Second, we used the CSR grade disclosed by the RKS (i.e., *Rank*) as an alternative measure of CSR performance and re-examined our hypotheses. RKS not only provides a social responsibility score but also ranks companies on their CSR performance from AAA+ to C (a total of 19 grades) based on this score. We constructed *Rank* by assigning a value of 19 (1) to the AAA+ (C) grade, which indicates the highest (lowest) quality of the CSR. Thus, the higher the value of *Rank*, the better the CSR performance. The results in Table 7 indicate that returnee executives with a greater geographic diversity of foreign experience have a positive effect on firms' CSR ranking. This effect is stronger when firms have central political connections, and regional market development is better. These results are generally in line with the baseline results in Table 4.

Third, considering that executives may also have work or study experience in developing regions, we also controlled for the average number of developing countries (See S1 Table for a country-specific list) where executives studied or worked abroad (*DevelopingCou*). The results

**Table 4. The effect of the geographic diversity of returnee executives' foreign experience on firms' CSR.**

| Model No.                           | Model 1               | Model 2                | Model 3                | Model 4                | Model 5                | Model 6                | Model 7                |
|-------------------------------------|-----------------------|------------------------|------------------------|------------------------|------------------------|------------------------|------------------------|
| Geographic diversity (H1)           | 4.007***<br>(5.448)   |                        | 1.846***<br>(3.115)    | 1.506***<br>(2.616)    | 1.809***<br>(3.112)    | 1.447**<br>(2.267)     | 1.028<br>(1.632)       |
| Geographic diversity*CentralPC (H2) |                       |                        |                        | 1.522**<br>(2.412)     |                        |                        | 1.678**<br>(2.212)     |
| CentralPC                           |                       |                        |                        | 0.036<br>(0.068)       |                        |                        | 0.098<br>(0.186)       |
| Geographic diversity*LocalPC (H2)   |                       |                        |                        |                        | 0.189<br>(1.013)       |                        | -0.020<br>(-0.101)     |
| LocalPC                             |                       |                        |                        |                        | -0.051<br>(-0.379)     |                        | -0.064<br>(-0.482)     |
| Geographic diversity*MarketDev (H3) |                       |                        |                        |                        |                        | 0.676*<br>(1.780)      | 0.763**<br>(1.995)     |
| MarketDev                           |                       |                        |                        |                        |                        | 0.275<br>(1.186)       | 0.273<br>(1.186)       |
| ROA                                 |                       | 2.005<br>(0.807)       | 2.371<br>(0.963)       | 2.298<br>(0.937)       | 2.308<br>(0.939)       | 2.191<br>(0.887)       | 2.140<br>(0.871)       |
| Leverage                            |                       | -4.950**<br>(-2.457)   | -4.749**<br>(-2.396)   | -4.538**<br>(-2.305)   | -4.763**<br>(-2.405)   | -4.795**<br>(-2.434)   | -4.645**<br>(-2.376)   |
| Equity concentration                |                       | 0.075***<br>(3.133)    | 0.077***<br>(3.240)    | 0.077***<br>(3.229)    | 0.077***<br>(3.221)    | 0.076***<br>(3.181)    | 0.075***<br>(3.161)    |
| Firm age                            |                       | -0.083<br>(-1.185)     | -0.075<br>(-1.089)     | -0.067<br>(-0.977)     | -0.075<br>(-1.074)     | -0.072<br>(-1.041)     | -0.066<br>(-0.950)     |
| Firm size                           |                       | 3.764***<br>(10.200)   | 3.603***<br>(10.024)   | 3.545***<br>(9.690)    | 3.611***<br>(9.750)    | 3.602***<br>(10.106)   | 3.560***<br>(9.614)    |
| Board size                          |                       | 0.166<br>(1.595)       | 0.168<br>(1.619)       | 0.161<br>(1.523)       | 0.179*<br>(1.690)      | 0.181*<br>(1.777)      | 0.182*<br>(1.728)      |
| Board independence                  |                       | -2.840<br>(-0.912)     | -2.661<br>(-0.865)     | -2.662<br>(-0.884)     | -2.527<br>(-0.822)     | -2.480<br>(-0.815)     | -2.295<br>(-0.767)     |
| Duality                             |                       | -0.196<br>(-0.306)     | -0.240<br>(-0.381)     | -0.228<br>(-0.363)     | -0.226<br>(-0.360)     | -0.311<br>(-0.494)     | -0.308<br>(-0.493)     |
| Female executive                    |                       | 2.224***<br>(3.558)    | 2.089***<br>(3.355)    | 2.108***<br>(3.404)    | 2.112***<br>(3.401)    | 2.087***<br>(3.383)    | 2.115***<br>(3.459)    |
| Executive age                       |                       | 0.143<br>(1.496)       | 0.145<br>(1.511)       | 0.140<br>(1.467)       | 0.148<br>(1.551)       | 0.146<br>(1.536)       | 0.145<br>(1.548)       |
| Foreigner                           |                       | 3.209***<br>(2.667)    | 2.956**<br>(2.501)     | 2.977**<br>(2.537)     | 3.005**<br>(2.534)     | 2.823**<br>(2.368)     | 2.810**<br>(2.364)     |
| Returnee director                   |                       | 1.068*<br>(1.841)      | 0.676<br>(1.158)       | 0.770<br>(1.329)       | 0.686<br>(1.178)       | 0.648<br>(1.097)       | 0.761<br>(1.299)       |
| SOE                                 |                       | 0.906<br>(1.164)       | 1.045<br>(1.364)       | 0.997<br>(1.308)       | 1.050<br>(1.366)       | 1.073<br>(1.397)       | 1.031<br>(1.348)       |
| Constant                            | 37.914***<br>(96.577) | -59.251***<br>(-7.388) | -56.188***<br>(-7.141) | -54.400***<br>(-6.802) | -56.278***<br>(-6.903) | -56.030***<br>(-7.180) | -55.364***<br>(-6.816) |
| Industry FE                         | yes                   | yes                    | yes                    | yes                    | yes                    | yes                    | yes                    |
| Year FE                             | yes                   | yes                    | yes                    | yes                    | yes                    | yes                    | yes                    |
| Observations                        | 4844                  | 4844                   | 4844                   | 4844                   | 4844                   | 4844                   | 4844                   |
| Adjusted R-squared                  | 0.182                 | 0.364                  | 0.370                  | 0.373                  | 0.370                  | 0.373                  | 0.376                  |

(Continued)

Table 4. (Continued)

| Model No. | Model 1  | Model 2  | Model 3  | Model 4  | Model 5  | Model 6  | Model 7  |
|-----------|----------|----------|----------|----------|----------|----------|----------|
| F         | 29.69*** | 19.18*** | 18.93*** | 17.13*** | 16.74*** | 17.34*** | 14.80*** |

Note. Robust t-statistics (in parentheses) are based on the standard errors clustered by firm to address potential serial correlations in the residuals.

\*\*\* p<0.01,

\*\* p<0.05,

\* p<0.1.

<https://doi.org/10.1371/journal.pone.0300262.t004>

in Table 8 show that returnee executives' foreign experience in developing countries has no significant effect on CSR. This suggests that experience in developed countries is more conducive to improving firms' CSR than experience in developing countries. Our findings remain valid after controlling for the influence of experience in developing countries.

In addition, we also tested the main hypotheses on a subsample excluding 2009 data. As we all know, China suffered a major natural disaster in 2008 (i.e., the "Wenchuan" earthquake). After that, the Chinese government issued a series of preferential policies to encourage all sectors of society to donate and help in the post-disaster reconstruction actively. The release of these policies led to a significant increase in firms' CSR investment in 2009. Therefore, to exclude the effect of these policies, we re-tested the main hypothesis based on data covering 2010–2018, and our results remain unchanged (See Table 9).

## Heterogeneity analysis

**Foreign working experience vs. foreign education experience.** Different experiences or competencies of managers affect managerial decision-making in different ways. Prior studies suggest that international work experience is more helpful for returnees to disseminate advanced knowledge of business and corporate governance in emerging market firms [81, 82]. Therefore, we predict that returnee executives with foreign work experience may significantly influence CSR more than those with foreign education experience. We created two variables (i.e., *Geographic diversity\_E* and *Geographic diversity\_W*) to measure the education and work experiences of returnee executives from developed countries. *Geographic diversity\_E* is the average number of developed countries where returnee executives studied abroad. *Geographic diversity\_W* is the average number of developed countries where returnee executives worked abroad. In addition, we similarly constructed two variables (i.e., *DevelopingCou\_E* and *DevelopingCou\_W*) to measure the education and work experience obtained by returnee executives in developing countries. *DevelopingCou\_E* is the average number of developing countries where returnee executives studied abroad. *DevelopingCou\_W* is the average number of developing countries where returnee executives worked abroad. Models 1 and 2 in Table 10 indicate that foreign work experience from developed countries may be more helpful to returnee executives in improving firms' CSR than foreign education experience gained from developed countries. Furthermore, we find that neither education nor work experience in developing countries has a significant impact on firms' CSR.

**Heavily polluting industries vs. lightly polluting industries.** The impact of industry is of great importance, as different industries may have evolved varying approaches to CSR [83]. Previous studies have found a systematic relationship between broad industry characteristics and CSR activities. A recent study [84] documents the positive impact of executives' overseas backgrounds on the green innovation performance of firms. It highlights that this effect differs significantly between firms in different industries (e.g., heavily and lightly polluting

**Table 5. Endogenous test results.**

| Model No.                                                   | Model 1                 |
|-------------------------------------------------------------|-------------------------|
| Geographic diversity                                        | 2.802***<br>(3.852)     |
| ROA                                                         | -3.270<br>(-1.363)      |
| Leverage                                                    | -6.989***<br>(-3.768)   |
| Equity concentration                                        | 0.088***<br>(3.708)     |
| Firm age                                                    | 0.049<br>(0.780)        |
| Firm size                                                   | 3.668***<br>(10.394)    |
| Board size                                                  | 0.268**<br>(2.411)      |
| Board independence                                          | -0.674<br>(-0.212)      |
| Duality                                                     | 0.054<br>(0.078)        |
| Female executive                                            | 2.296***<br>(3.646)     |
| Executive age                                               | 0.387***<br>(4.123)     |
| Foreigner                                                   | 3.054**<br>(2.546)      |
| Returnee director                                           | 0.703<br>(1.153)        |
| SOE                                                         | -0.334<br>(-0.443)      |
| Constant                                                    | -71.168***<br>(-10.113) |
| Observations                                                | 4844                    |
| Centered R-squared                                          | 0.307                   |
| F                                                           | 30.58***                |
| Under-identification test (Kleibergen-Paap rk LM statistic) | 67.292***               |
| Cragg-Donald Wald F statistic                               | 378.417***              |
| Stock-Yogo critical value (at 10% maximal IV size)          | 11.52                   |
| Hansen J                                                    | 0.321                   |

Note. Robust z-statistics (in parentheses) are based on the standard errors clustered by firms to address potential serial correlations in the residuals.

\*\*\*  $p < 0.01$ ,

\*\*  $p < 0.05$ ,

\*  $p < 0.1$ .

<https://doi.org/10.1371/journal.pone.0300262.t005>

industries). Firms in heavily polluting industries lead to high levels of air and environmental pollution, while firms in lightly polluting industries do not. Thus, based on the Guidelines for Environmental Information Disclosure of Listed Companies issued by China's Ministry of Environmental Protection in 2010, we divided the sample firms into two groups: those in

**Table 6. Robustness checks for an alternative measure of the geographic diversity of returnee executives' foreign experience.**

| Model No.                       | Model 1                | Model 2                | Model 3                | Model 4                | Model 5                |
|---------------------------------|------------------------|------------------------|------------------------|------------------------|------------------------|
| Geographic diversity1           | 1.243***<br>(2.768)    | 1.017**<br>(2.400)     | 1.226***<br>(2.828)    | 0.889*<br>(1.827)      | 0.551<br>(1.150)       |
| Geographic diversity1*CentralPC |                        | 0.735**<br>(2.090)     |                        |                        | 0.977**<br>(2.513)     |
| CentralPC                       |                        | 0.059<br>(0.110)       |                        |                        | 0.113<br>(0.209)       |
| Geographic diversity1*LocalPC   |                        |                        | 0.058<br>(0.470)       |                        | -0.076<br>(-0.076)     |
| LocalPC                         |                        |                        | -0.048<br>(-0.359)     |                        | -0.058<br>(-0.432)     |
| Geographic diversity1*MarketDev |                        |                        |                        | 0.506*<br>(1.922)      | 0.602**<br>(2.280)     |
| MarketDev                       |                        |                        |                        | 0.278<br>(1.201)       | 0.289<br>(1.249)       |
| ROA                             | 2.443<br>(0.994)       | 2.442<br>(0.993)       | 2.457<br>(1.000)       | 2.341<br>(0.951)       | 2.373<br>(0.965)       |
| Leverage                        | -4.786**<br>(-2.407)   | -4.636**<br>(-2.342)   | -4.810**<br>(-2.415)   | -4.811**<br>(-2.431)   | -4.731**<br>(-2.401)   |
| Equity concentration            | 0.076***<br>(3.188)    | 0.076***<br>(3.202)    | 0.076***<br>(3.175)    | 0.075***<br>(3.149)    | 0.076***<br>(3.164)    |
| Firm age                        | -0.077<br>(-1.115)     | -0.070<br>(-1.012)     | -0.078<br>(-1.115)     | -0.074<br>(-1.073)     | -0.069<br>(-0.989)     |
| Firm size                       | 3.586***<br>(9.959)    | 3.540***<br>(9.668)    | 3.597***<br>(9.660)    | 3.588***<br>(10.038)   | 3.561***<br>(9.571)    |
| Board size                      | 0.168<br>(1.621)       | 0.161<br>(1.532)       | 0.178*<br>(1.684)      | 0.182*<br>(1.781)      | 0.180*<br>(1.714)      |
| Board independence              | -2.733<br>(-0.890)     | -2.832<br>(-0.945)     | -2.620<br>(-0.855)     | -2.589<br>(-0.851)     | -2.489<br>(-0.836)     |
| Duality                         | -0.265<br>(-0.421)     | -0.281<br>(-0.446)     | -0.259<br>(-0.412)     | -0.319<br>(-0.507)     | -0.361<br>(-0.575)     |
| Female executive                | 2.127***<br>(3.415)    | 2.172***<br>(3.511)    | 2.149***<br>(3.461)    | 2.117***<br>(3.429)    | 2.164***<br>(3.540)    |
| Executive age                   | 0.149<br>(1.554)       | 0.142<br>(1.487)       | 0.151<br>(1.590)       | 0.151<br>(1.588)       | 0.147<br>(1.564)       |
| Foreigner                       | 2.954**<br>(2.492)     | 2.994**<br>(2.534)     | 2.973**<br>(2.500)     | 2.846**<br>(2.388)     | 2.822**<br>(2.362)     |
| Returnee director               | 0.725<br>(1.239)       | 0.802<br>(1.385)       | 0.729<br>(1.250)       | 0.695<br>(1.176)       | 0.802<br>(1.371)       |
| SOE                             | 1.027<br>(1.338)       | 1.022<br>(1.336)       | 1.036<br>(1.346)       | 1.047<br>(1.360)       | 1.045<br>(1.362)       |
| Constant                        | -55.842***<br>(-7.090) | -54.279***<br>(-6.788) | -56.009***<br>(-6.834) | -55.872***<br>(-7.129) | -55.368***<br>(-6.786) |
| Industry FE                     | yes                    | yes                    | yes                    | yes                    | yes                    |
| Year FE                         | yes                    | yes                    | yes                    | yes                    | yes                    |
| Observations                    | 4844                   | 4844                   | 4844                   | 4844                   | 4844                   |
| Adjusted R-squared              | 0.370                  | 0.372                  | 0.370                  | 0.372                  | 0.375                  |

(Continued)

Table 6. (Continued)

| Model No. | Model 1  | Model 2  | Model 3  | Model 4  | Model 5  |
|-----------|----------|----------|----------|----------|----------|
| F         | 18.97*** | 17.04*** | 16.72*** | 17.20*** | 14.68*** |

Note. Robust t-statistics (in parentheses) are based on the standard errors clustered by firms to address potential serial correlations in the residuals.

\*\*\*  $p < 0.01$ ,

\*\*  $p < 0.05$ ,

\*  $p < 0.1$ .

<https://doi.org/10.1371/journal.pone.0300262.t006>

heavily polluting industries and those in lightly polluting industries (See [S3 Table](#) for details), in order to examine the heterogeneous effect of the industry. Models 3 and 4 of [Table 10](#) report the results for firms in heavily polluting industries and lightly polluting industries, respectively. The results show that returnee executives' geographic diversity promotes the CSR of firms in lightly polluting industries but not heavily polluting industries. This may be because there is a self-selection effect for returnee executives who choose to work in heavily polluting industries. That is, only returnee executives who do not value social responsibility are willing to work in highly polluting industries with poor social responsibility performance.

### Mechanism analysis

**The mediating effect of corporate donation.** Previous research shows that having returnees on the corporate board remarkably boosts firms' donations [85]. Thus, we predict that returnee executives can improve CSR by promoting corporate giving. Referring to prior studies [86, 87], we measure corporate donation as the natural logarithm of the firm's donation amount plus 1. We test for the mediating role of corporate donation using the Sobel intermediary factor test method [88]. The indirect effect is how the independent variable transmits its effect on the dependent variable via the mediator [89]. The Sobel test verifies the significance of the indirect effect. [Table 11](#) reports the results of the mediating role of corporate donation. The Sobel test verifies the mediating effect of *Dona* [Sobel = 2.66 (0.06),  $p < 0.01$ ] on the relationship between returnee executives' geographic diversity and firms' CSR. In addition, we used the bootstrap method [90, 91] to re-examine the mediating role of corporate donations, as some scholars have recently raised doubts about the Sobel test. 5000 samples were selected using the nonparametric percentile method for deviation correction, with a confidence interval (CI) of 95%. We find that the 95% CI ranges from 0.02 to 0.28. These results further verify the mediating role of corporate donations.

**The mediating effect of corporate green innovation.** Previous literature suggests that returnee executives can promote corporate green innovation [21, 84], and the increased level of green innovation contributes to CSR improvement. Therefore, we examined whether returnee executives' geographic diversity influences firms' CSR performance through corporate green innovation. Specifically, we select the natural logarithm of the number of green patent applications of firms plus 1 to measure firms' green innovation (*GreenInn*), which is widely adopted in the literature [84, 92, 93]. Models 3 and 4 of [Table 11](#) exhibit the results of the mediating role of corporate green innovation. The results of the Sobel test verify the mediating effect of *GreenInn* [Sobel = 3.65 (0.04),  $p < 0.01$ ] on the relationship between returnee executives' geographic diversity and CSR. In addition, the results of the Bootstrap method indicate that the indirect effect of the geographic diversity of foreign experience on firms' CSR through *GreenInn* is significant, as its CI ranges from 0.04 to 0.22.

Table 7. Robustness checks for an alternative measure of firms' CSR performance.

| Model No.                      | Model 1                | Model 2                | Model 3                | Model 4                | Model 5                |
|--------------------------------|------------------------|------------------------|------------------------|------------------------|------------------------|
| Dependent variables            | Rank                   | Rank                   | Rank                   | Rank                   | Rank                   |
| Geographic diversity           | 0.468***<br>(3.016)    | 0.377**<br>(2.476)     | 0.460***<br>(3.015)    | 0.359**<br>(2.144)     | 0.252<br>(1.521)       |
| Geographic diversity*CentralPC |                        | 0.419**<br>(2.407)     |                        |                        | 0.445**<br>(2.133)     |
| CentralPC                      |                        | 0.064<br>(0.461)       |                        |                        | 0.088<br>(0.628)       |
| Geographic diversity*LocalPC   |                        |                        | 0.055<br>(1.091)       |                        | -0.003<br>(-0.054)     |
| LocalPC                        |                        |                        | -0.021<br>(-0.591)     |                        | -0.028<br>(-0.799)     |
| Geographic diversity*MarketDev |                        |                        |                        | 0.167*<br>(1.716)      | 0.186*<br>(1.924)      |
| MarketDev                      |                        |                        |                        | 0.071<br>(1.193)       | 0.069<br>(1.171)       |
| ROA                            | 1.013<br>(1.474)       | 0.963<br>(1.411)       | 0.995<br>(1.449)       | 0.957<br>(1.388)       | 0.915<br>(1.338)       |
| Leverage                       | -1.271**<br>(-2.386)   | -1.201**<br>(-2.269)   | -1.282**<br>(-2.413)   | -1.280**<br>(-2.416)   | -1.235**<br>(-2.351)   |
| Equity concentration           | 0.018***<br>(2.899)    | 0.018***<br>(2.898)    | 0.018***<br>(2.873)    | 0.018***<br>(2.846)    | 0.018***<br>(2.831)    |
| Firm age                       | -0.023<br>(-1.289)     | -0.021<br>(-1.168)     | -0.024<br>(-1.294)     | -0.022<br>(-1.239)     | -0.021<br>(-1.173)     |
| Firm size                      | 0.929***<br>(9.687)    | 0.906***<br>(9.265)    | 0.934***<br>(9.511)    | 0.928***<br>(9.761)    | 0.913***<br>(9.260)    |
| Board size                     | 0.047*<br>(1.727)      | 0.043<br>(1.574)       | 0.051*<br>(1.847)      | 0.050*<br>(1.887)      | 0.051*<br>(1.841)      |
| Board independence             | -0.651<br>(-0.785)     | -0.668<br>(-0.825)     | -0.593<br>(-0.717)     | -0.605<br>(-0.735)     | -0.537<br>(-0.666)     |
| Duality                        | 0.015<br>(0.089)       | 0.018<br>(0.106)       | 0.019<br>(0.114)       | -0.006<br>(-0.038)     | -0.007<br>(-0.041)     |
| Female executive               | 0.497***<br>(2.975)    | 0.503***<br>(3.031)    | 0.504***<br>(3.020)    | 0.499***<br>(3.012)    | 0.509***<br>(3.100)    |
| Executive age                  | 0.040<br>(1.492)       | 0.039<br>(1.442)       | 0.041<br>(1.546)       | 0.040<br>(1.512)       | 0.041<br>(1.539)       |
| Foreigner                      | 0.688**<br>(2.230)     | 0.696**<br>(2.276)     | 0.700**<br>(2.261)     | 0.658**<br>(2.118)     | 0.655**<br>(2.120)     |
| Returnee director              | 0.154<br>(0.997)       | 0.180<br>(1.181)       | 0.156<br>(1.017)       | 0.147<br>(0.935)       | 0.178<br>(1.150)       |
| SOE                            | 0.327<br>(1.536)       | 0.321<br>(1.511)       | 0.330<br>(1.544)       | 0.334<br>(1.565)       | 0.332<br>(1.562)       |
| Constant                       | -16.304***<br>(-7.722) | -15.652***<br>(-7.280) | -16.439***<br>(-7.531) | -16.258***<br>(-7.768) | -16.036***<br>(-7.345) |
| Industry FE                    | yes                    | yes                    | yes                    | yes                    | yes                    |
| Year FE                        | yes                    | yes                    | yes                    | yes                    | yes                    |
| Observations                   | 4554                   | 4554                   | 4554                   | 4554                   | 4554                   |
| Adjusted R-squared             | 0.336                  | 0.339                  | 0.336                  | 0.338                  | 0.342                  |

(Continued)



Table 7. (Continued)

| Model No.           | Model 1  | Model 2  | Model 3  | Model 4  | Model 5  |
|---------------------|----------|----------|----------|----------|----------|
| Dependent variables | Rank     | Rank     | Rank     | Rank     | Rank     |
| F                   | 17.96*** | 16.27*** | 15.85*** | 16.24*** | 13.60*** |

Note. Robust t-statistics (in parentheses) are based on the standard errors clustered by firms to address potential serial correlations in the residuals.

\*\*\*  $p < 0.01$ ,

\*\*  $p < 0.05$ ,

\*  $p < 0.1$ .

<https://doi.org/10.1371/journal.pone.0300262.t007>

## Discussion

This paper provides a theoretical analysis and relevant empirical evidence on the effects of returnee executives' geographic diversity on firms' CSR performance to illustrate the effect of returnees on corporate social behavior.

First, the hypothesis concerning the positive impact of the geographic diversity of returnee executives' foreign experience on CSR (H1) is verified, which expands the literature on the diversity of foreign experience to some extent. Prior studies show that the geographic diversity of executives' foreign experience differentially affects firm outcomes in creative innovation [22], post-acquisition performance [23], and internationalization [24]. This paper extends the existing literature by demonstrating the positive effect of the geographic diversity of returnee executives' foreign experience on firms' CSR performance.

Second, this paper analyzes the two boundary conditions of the geographic diversity of foreign experience and CSR. One is corporate political connections (H2), measured by the number of TMT and board members who have worked in central-level and local-level government agencies, respectively. Previous studies [52, 72] suggest that political connections at different levels may affect firms' social behavior differently, given China's institutional complexity. This paper further demonstrates that central and local government political connections differentially moderate the relationship between the geographic diversity of executives' foreign experience and CSR. More specifically, political connections at the central level significantly strengthen the positive effect of returnee executives' geographic diversity on firms' CSR, while political connections at the local level do not. This discrepancy in results may be ascribed to China's unique political structure. Under this political structure, central and local government officials develop different mindsets and goals [73, 74]. In particular, local government officials are generally perceived to prioritize local economic growth over CSR improvement, influenced by both China's regionally decentralized authoritarian regime [94] and political promotion system [95]. In this sense, executives who have worked in local government agencies are well aware of this and are likely to communicate this information to the companies they serve. In doing so, firms' CSR investments may be constrained. This may be why we do not observe a significant moderating effect of local political connections on the relationship between returnee executives and CSR.

However, unlike local governments, which see economic growth as their primary goal, the central government is more concerned with social and environmental outcomes [71], especially since 2006, when the central government initiated a new goal of developing a "harmonious society." In this vein, executives associated with the central government convey the urgency and priority of CSR to other members of the TMT, such as returnee executives, because the harmonious society policy is seen to share common goals with CSR [96]. As a result, central-level political connections notably intensify the influence of returnee executives on CSR, while local-level political connections do not.

Table 8. Robustness checks controlling for executives' foreign experience in developing regions.

| Model No.                      | Model 1                | Model 2                | Model 3                | Model 4                | Model 5                |
|--------------------------------|------------------------|------------------------|------------------------|------------------------|------------------------|
| Geographic diversity           | 1.860***<br>(3.076)    | 1.542***<br>(2.632)    | 1.821***<br>(3.064)    | 1.463**<br>(2.249)     | 1.070*<br>(1.667)      |
| Geographic diversity*CentralPC |                        | 1.542**<br>(2.468)     |                        |                        | 1.714**<br>(2.278)     |
| CentralPC                      |                        | 0.043<br>(0.081)       |                        |                        | 0.107<br>(0.205)       |
| Geographic diversity*LocalPC   |                        |                        | 0.188<br>(1.006)       |                        | -0.029<br>(-0.143)     |
| LocalPC                        |                        |                        | -0.051<br>(-0.381)     |                        | -0.066<br>(-0.496)     |
| Geographic diversity*MarketDev |                        |                        |                        | 0.676*<br>(1.782)      | 0.763**<br>(2.000)     |
| MarketDev                      |                        |                        |                        | 0.275<br>(1.187)       | 0.274<br>(1.190)       |
| DevelopingCou                  | -0.141<br>(-0.142)     | -0.410<br>(-0.407)     | -0.122<br>(-0.124)     | -0.160<br>(-0.161)     | -0.483<br>(-0.470)     |
| ROA                            | 2.386<br>(0.969)       | 2.340<br>(0.956)       | 2.322<br>(0.945)       | 2.208<br>(0.894)       | 2.193<br>(0.894)       |
| Leverage                       | -4.734**<br>(-2.383)   | -4.490**<br>(-2.278)   | -4.750**<br>(-2.395)   | -4.778**<br>(-2.420)   | -4.591**<br>(-2.346)   |
| Equity concentration           | 0.077***<br>(3.240)    | 0.077***<br>(3.230)    | 0.077***<br>(3.221)    | 0.076***<br>(3.181)    | 0.075***<br>(3.162)    |
| Firm age                       | -0.075<br>(-1.087)     | -0.067<br>(-0.969)     | -0.075<br>(-1.073)     | -0.071<br>(-1.038)     | -0.066<br>(-0.943)     |
| Firm size                      | 3.602***<br>(10.013)   | 3.540***<br>(9.667)    | 3.610***<br>(9.744)    | 3.601***<br>(10.093)   | 3.555***<br>(9.595)    |
| Board size                     | 0.169<br>(1.622)       | 0.161<br>(1.529)       | 0.180*<br>(1.693)      | 0.182*<br>(1.781)      | 0.183*<br>(1.739)      |
| Board independence             | -2.667<br>(-0.868)     | -2.683<br>(-0.891)     | -2.532<br>(-0.824)     | -2.488<br>(-0.818)     | -2.312<br>(-0.772)     |
| Duality                        | -0.245<br>(-0.390)     | -0.243<br>(-0.388)     | -0.231<br>(-0.369)     | -0.316<br>(-0.504)     | -0.326<br>(-0.524)     |
| Female executive               | 2.086***<br>(3.350)    | 2.099***<br>(3.389)    | 2.110***<br>(3.396)    | 2.084***<br>(3.378)    | 2.105***<br>(3.443)    |
| Executive age                  | 0.145<br>(1.512)       | 0.140<br>(1.469)       | 0.148<br>(1.552)       | 0.146<br>(1.537)       | 0.146<br>(1.551)       |
| Foreigner                      | 2.961**<br>(2.509)     | 2.991**<br>(2.555)     | 3.009**<br>(2.541)     | 2.828**<br>(2.376)     | 2.823**<br>(2.380)     |
| Returnee director              | 0.679<br>(1.162)       | 0.781<br>(1.345)       | 0.689<br>(1.181)       | 0.651<br>(1.101)       | 0.774<br>(1.318)       |
| SOE                            | 1.043<br>(1.362)       | 0.990<br>(1.299)       | 1.048<br>(1.365)       | 1.070<br>(1.395)       | 1.023<br>(1.339)       |
| Constant                       | -56.173***<br>(-7.138) | -54.303***<br>(-6.791) | -56.266***<br>(-6.902) | -56.009***<br>(-7.176) | -55.273***<br>(-6.807) |
| Industry FE                    | yes                    | yes                    | yes                    | yes                    | yes                    |
| Year FE                        | yes                    | yes                    | yes                    | yes                    | yes                    |
| Observations                   | 4844                   | 4844                   | 4844                   | 4844                   | 4844                   |

(Continued)

Table 8. (Continued)

| Model No.          | Model 1  | Model 2  | Model 3  | Model 4  | Model 5  |
|--------------------|----------|----------|----------|----------|----------|
| Adjusted R-squared | 0.370    | 0.373    | 0.370    | 0.373    | 0.376    |
| F                  | 17.68*** | 16.17*** | 15.77*** | 16.33*** | 14.18*** |

Note. Robust t-statistics (in parentheses) are based on the standard errors clustered by firms to address potential serial correlations in the residuals.

\*\*\*  $p < 0.01$ ,

\*\*  $p < 0.05$ ,

\*  $p < 0.1$ .

<https://doi.org/10.1371/journal.pone.0300262.t008>

Another boundary condition is regional market development (H3), a key factor impacting firms' CSR [97–99]. Literature states that in regions with high levels of market development, firms have fewer external constraints and more freedom of action, and their executives' managerial discretion is also greater [59, 60]. This paper reveals that good market development increases the discretion of returnee executives in CSR decisions, thereby augmenting the positive effect of the geographic diversity of returnee executives' foreign experience on firms' CSR.

## Conclusion

A large body of literature concentrates on the firm- and institution-level factors driving CSR, with less attention paid to the impact of returnee executives. This paper investigates the impact of returnee executives (measured by the geographic diversity of foreign experience) on firms' CSR based on China's A-share-listed companies for the period 2009–2018 and draws the following conclusions: (1) the geographic diversity of returnee executives' foreign experience positively affects firms' CSR; (2) this effect is stronger in firms with political connections with the central government; (3) this effect is stronger in regions with good market development. In addition, the mechanism analysis shows that TMTs with a broad scope of foreign experience drive firms' CSR by promoting corporate donations and green innovation.

## Theoretical contribution

This paper contributes to the existing literature in several ways. First, this study adds to the research on CSR determinants in China. Scholarly work on CSR has demonstrated that a firm's CSR level is determined by a combination of many factors, including institutional-level factors [70, 100, 101], enterprises' characteristics [9, 53, 102], corporate governance structure [103, 104], executives' experience and values [8, 105, 106], and financial performance [107, 108]. However, little attention has been paid to returnees. In contrast to previous studies [12, 13, 109] focusing on the impact of the number of returnee executives or the duration of foreign experience on CSR, this paper documents the positive effect of the geographic diversity of returnee executives' foreign experience on firms' CSR. The results of this paper enrich our understanding of the CSR determinants in emerging markets.

This study also extends the work on the role of returnees in China. Previous studies suggest that returnees can influence the behavior and performance of firms, including new venture creation [1–3], innovation performance [5, 21], internationalization [4], fraudulent behavior [82], tax avoidance [110], and cross-border acquisitions [111]. In contrast to their primary focus on the number of returnees or the length of their stay abroad, this paper concentrates on the impact of returnees' heterogeneity in geographical scope on firm behavior, revealing the positive effect of returnee executives' geographic diversity on CSR. Our findings suggest that

Table 9. Robustness checks excluding the 2009 sample.

| Model No.                      | Model 1                | Model 2                | Model 3                | Model 4                | Model 5                |
|--------------------------------|------------------------|------------------------|------------------------|------------------------|------------------------|
| Geographic diversity           | 1.912***<br>(3.185)    | 1.583***<br>(2.702)    | 1.887***<br>(3.191)    | 1.511**<br>(2.292)     | 1.122*<br>(1.728)      |
| Geographic diversity*CentralPC |                        | 1.584**<br>(2.399)     |                        |                        | 1.710**<br>(2.168)     |
| CentralPC                      |                        | 0.096<br>(0.177)       |                        |                        | 0.163<br>(0.301)       |
| Geographic diversity*LocalPC   |                        |                        | 0.186<br>(0.947)       |                        | -0.031<br>(-0.146)     |
| LocalPC                        |                        |                        | -0.061<br>(-0.455)     |                        | -0.078<br>(-0.585)     |
| Geographic diversity*MarketDev |                        |                        |                        | 0.616<br>(1.587)       | 0.683*<br>(1.764)      |
| MarketDev                      |                        |                        |                        | 0.271<br>(1.160)       | 0.266<br>(1.146)       |
| ROA                            | 3.041<br>(1.168)       | 2.894<br>(1.119)       | 2.975<br>(1.144)       | 2.820<br>(1.079)       | 2.706<br>(1.043)       |
| Leverage                       | -4.907**<br>(-2.377)   | -4.682**<br>(-2.283)   | -4.935**<br>(-2.396)   | -4.935**<br>(-2.404)   | -4.783**<br>(-2.349)   |
| Equity concentration           | 0.074***<br>(3.055)    | 0.074***<br>(3.054)    | 0.074***<br>(3.031)    | 0.074***<br>(2.996)    | 0.073***<br>(2.983)    |
| Firm age                       | -0.088<br>(-1.268)     | -0.080<br>(-1.155)     | -0.089<br>(-1.263)     | -0.084<br>(-1.218)     | -0.080<br>(-1.143)     |
| Firm size                      | 3.670***<br>(9.932)    | 3.604***<br>(9.553)    | 3.683***<br>(9.719)    | 3.667***<br>(10.005)   | 3.624***<br>(9.514)    |
| Board size                     | 0.175*<br>(1.673)      | 0.165<br>(1.556)       | 0.188*<br>(1.758)      | 0.188*<br>(1.829)      | 0.189*<br>(1.776)      |
| Board independence             | -2.441<br>(-0.779)     | -2.457<br>(-0.801)     | -2.273<br>(-0.727)     | -2.261<br>(-0.728)     | -2.034<br>(-0.667)     |
| Duality                        | -0.199<br>(-0.307)     | -0.183<br>(-0.283)     | -0.184<br>(-0.285)     | -0.281<br>(-0.434)     | -0.277<br>(-0.431)     |
| Female executive               | 2.068***<br>(3.247)    | 2.090***<br>(3.299)    | 2.090***<br>(3.287)    | 2.075***<br>(3.284)    | 2.107***<br>(3.361)    |
| Executive age                  | 0.157<br>(1.547)       | 0.151<br>(1.505)       | 0.161<br>(1.592)       | 0.157<br>(1.561)       | 0.157<br>(1.580)       |
| Foreigner                      | 3.044**<br>(2.491)     | 3.060**<br>(2.526)     | 3.087**<br>(2.518)     | 2.930**<br>(2.380)     | 2.908**<br>(2.370)     |
| Returnee director              | 0.682<br>(1.134)       | 0.778<br>(1.306)       | 0.690<br>(1.150)       | 0.651<br>(1.069)       | 0.766<br>(1.269)       |
| SOE                            | 1.218<br>(1.539)       | 1.176<br>(1.491)       | 1.225<br>(1.544)       | 1.245<br>(1.568)       | 1.213<br>(1.534)       |
| Constant                       | -57.773***<br>(-7.185) | -55.790***<br>(-6.790) | -58.037***<br>(-6.975) | -57.536***<br>(-7.210) | -56.900***<br>(-6.818) |
| Industry FE                    | yes                    | yes                    | yes                    | yes                    | yes                    |
| Year FE                        | yes                    | yes                    | yes                    | yes                    | yes                    |
| Observations                   | 4554                   | 4554                   | 4554                   | 4554                   | 4554                   |
| Adjusted R-squared             | 0.346                  | 0.349                  | 0.346                  | 0.349                  | 0.352                  |

(Continued)

Table 9. (Continued)

| Model No. | Model 1  | Model 2  | Model 3  | Model 4  | Model 5  |
|-----------|----------|----------|----------|----------|----------|
| F         | 19.55*** | 17.74*** | 17.25*** | 17.75*** | 14.91*** |

Note. Robust t-statistics (in parentheses) are based on the standard errors clustered by firms to address potential serial correlations in the residuals.

\*\*\*  $p < 0.01$ ,

\*\*  $p < 0.05$ ,

\*  $p < 0.1$ .

<https://doi.org/10.1371/journal.pone.0300262.t009>

the geographic diversity of foreign experience may be an essential indicator for exploring the impact of returnees on firm behavior.

This study adds to understanding the boundary conditions of international knowledge transfer. Although existing literature has identified returnee executives as an important channel of knowledge transfer for emerging market firms, there is limited understanding of the boundary conditions of such knowledge transfer. Previous research shows certain factors that may hinder international knowledge transfer by returnee executives, such as difficult interpersonal relationships with colleagues and the administrative heritage of the firm [112]. This paper indicates that certain organizational (i.e., corporate political connections with the central government) and institutional (i.e., good market development) factors can facilitate knowledge transfer by investigating the boundary conditions for the relationship between returnee executives' geographic diversity and firms' CSR. Finally, this paper contributes to the literature on how returnees influence corporate social behavior by demonstrating the mediating role of corporate donations and green innovation on the relationship between returnee executives and CSR.

### Practical implications

This paper contributes to understanding returnees in China by demonstrating the positive effect of the geographic diversity of returnee executives on firms' CSR behavior. The research in this paper may have managerial implications in the following aspects. First, when hiring returnees as executives, companies should give preference to those with foreign experience in multiple countries. Second, hiring people who have worked in central government agencies as executives can help returnee executives play a more significant role in improving CSR. Third, accelerating the process of regional marketization and guaranteeing firms' managerial discretion in operating activities can promote the knowledge transfer of returnee executives. Finally, our findings are relevant not only to China but also to other emerging economies, especially those with weak institutional systems.

### Limitations and future research

Our study has several limitations. First, other characteristics of returnee executives' foreign experience may influence the relationship between the geographic diversity of foreign experience and CSR performance. Our study primarily captures the effect of the breadth of foreign experience on CSR. Future research could incorporate the length of time that returnee executives spend abroad or the heterogeneity in the country of origin of their overseas experience into the theoretical framework to comprehensively examine the impact of overseas experience on CSR.

Moreover, this study concentrates on the impact of the diversity of TMT's foreign experience on CSR, as TMT is the information processing and decision-making center of the firm.

Table 10. Heterogeneity analysis: Different types of foreign experience and industry attributes.

| Model No.              | Model 1                      | Model 2                    | Model 3                | Model 4                |
|------------------------|------------------------------|----------------------------|------------------------|------------------------|
|                        | Foreign education experience | Foreign working experience | Heavy-polluted         | Light-polluted         |
| Geographic diversity   |                              |                            | 0.397<br>(0.442)       | 2.632***<br>(3.572)    |
| Geographic diversity_E | 1.120<br>(1.158)             |                            |                        |                        |
| DevelopingCou_E        | 0.132<br>(0.037)             |                            |                        |                        |
| Geographic diversity_W |                              | 2.364***<br>(3.285)        |                        |                        |
| DevelopingCou_W        |                              | -0.252<br>(-0.249)         |                        |                        |
| ROA                    | 2.088<br>(0.845)             | 2.343<br>(0.947)           | 1.395<br>(0.306)       | 2.910<br>(1.020)       |
| Leverage               | -4.907**<br>(-2.440)         | -4.746**<br>(-2.386)       | -6.101*<br>(-1.779)    | -4.155*<br>(-1.708)    |
| Equity concentration   | 0.075***<br>(3.133)          | 0.078***<br>(3.291)        | 0.125***<br>(3.110)    | 0.059**<br>(2.036)     |
| Firm age               | -0.080<br>(-1.152)           | -0.079<br>(-1.147)         | -0.111<br>(-0.803)     | -0.060<br>(-0.773)     |
| Firm size              | 3.716***<br>(10.096)         | 3.582***<br>(9.876)        | 3.601***<br>(5.677)    | 3.539***<br>(8.263)    |
| Board size             | 0.171<br>(1.639)             | 0.162<br>(1.553)           | 0.250<br>(1.164)       | 0.100<br>(0.879)       |
| Board independence     | -2.815<br>(-0.902)           | -2.720<br>(-0.891)         | 0.976<br>(0.176)       | -3.552<br>(-0.977)     |
| Duality                | -0.232<br>(-0.364)           | -0.228<br>(-0.363)         | -1.058<br>(-0.953)     | -0.037<br>(-0.048)     |
| Female executive       | 2.176***<br>(3.477)          | 2.128***<br>(3.431)        | 1.816*<br>(1.761)      | 2.055***<br>(2.670)    |
| Executive age          | 0.144<br>(1.497)             | 0.149<br>(1.569)           | 0.116<br>(0.693)       | 0.132<br>(1.111)       |
| Foreigner              | 3.185***<br>(2.648)          | 2.902**<br>(2.484)         | 3.449<br>(1.383)       | 2.771**<br>(2.085)     |
| Returnee director      | 0.913<br>(1.560)             | 0.782<br>(1.347)           | 0.464<br>(0.408)       | 1.000<br>(1.463)       |
| SOE                    | 0.965<br>(1.240)             | 1.054<br>(1.386)           | 1.667<br>(1.202)       | 0.936<br>(1.008)       |
| Constant               | -58.334***<br>(-7.293)       | -55.883***<br>(-7.043)     | -58.414***<br>(-4.320) | -52.854***<br>(-5.585) |
| Industry FE            | yes                          | yes                        | yes                    | yes                    |
| Year FE                | yes                          | yes                        | yes                    | yes                    |
| Observations           | 4844                         | 4844                       | 1388                   | 3456                   |
| Adjusted R-squared     | 0.365                        | 0.372                      | 0.415                  | 0.361                  |
| F                      | 16.85***                     | 18.01***                   | 6.36***                | 14.64***               |

Note. Robust t-statistics (in parentheses) are based on the standard errors clustered by firms to address potential serial correlations in the residuals.

\*\*\* p<0.01,

\*\* p<0.05,

\* p<0.1.

<https://doi.org/10.1371/journal.pone.0300262.t010>

Table 11. Mechanism analysis.

| Model No.            | Model 1                 | Model 2                 | Model 3                    | Model 4                 |
|----------------------|-------------------------|-------------------------|----------------------------|-------------------------|
|                      | Corporate donation      |                         | Corporate green innovation |                         |
| Dependent variables  | Dona                    | CSR_Score               | GreenInn                   | CSR_Score               |
| Dona                 |                         | 0.825***<br>(14.850)    |                            |                         |
| Geographic diversity | 0.186***<br>(2.700)     | 1.692***<br>(6.390)     | 0.111***<br>(4.070)        | 1.723***<br>(6.400)     |
| GreenInn             |                         |                         |                            | 1.188***<br>(8.330)     |
| ROA                  | 2.764***<br>(7.160)     | 0.091<br>(0.060)        | 0.861***<br>(5.630)        | 1.298<br>(0.860)        |
| Leverage             | -1.109***<br>(-4.650)   | -3.834***<br>(-4.170)   | 0.059<br>(0.630)           | -4.853***<br>(-5.200)   |
| Equity concentration | 0.004<br>(1.370)        | 0.074***<br>(7.500)     | -0.004***<br>(-4.160)      | 0.082***<br>(8.190)     |
| Firm age             | -0.032***<br>(-4.180)   | -0.049*<br>(-1.660)     | -0.019***<br>(-6.120)      | -0.051*<br>(-1.690)     |
| Firm size            | 0.687***<br>(18.820)    | 3.036***<br>(20.850)    | 0.316***<br>(21.890)       | 3.232***<br>(21.590)    |
| Board size           | 0.013<br>(0.940)        | 0.158***<br>(2.980)     | 0.009*<br>(1.710)          | 0.159***<br>(2.960)     |
| Board independence   | 0.757<br>(1.510)        | -3.285*<br>(-1.700)     | -0.384*<br>(-1.930)        | -2.230<br>(-1.140)      |
| Duality              | -0.058<br>(-0.600)      | -0.192<br>(-0.510)      | 0.125***<br>(3.230)        | -0.425<br>(-1.110)      |
| Female executive     | 0.053<br>(0.710)        | 2.046***<br>(7.100)     | 0.143***<br>(4.810)        | 1.911***<br>(6.510)     |
| Executive age        | 0.023*<br>(1.940)       | 0.126***<br>(2.740)     | -0.007<br>(-1.410)         | 0.153***<br>(3.280)     |
| Foreigner            | 0.223<br>(1.500)        | 2.772***<br>(4.860)     | 0.198***<br>(3.370)        | 2.749***<br>(4.730)     |
| Returnee director    | -0.113<br>(-1.450)      | 0.769**<br>(2.570)      | -0.012<br>(-0.400)         | 0.673**<br>(2.220)      |
| SOE                  | -0.559***<br>(-6.070)   | 1.506***<br>(4.230)     | 0.047<br>(1.300)           | 0.991***<br>(2.750)     |
| Constant             | -13.410***<br>(-15.340) | -55.410***<br>(-16.080) | -6.441***<br>(-18.610)     | -58.910***<br>(-16.640) |
| Industry FE          | yes                     | yes                     | yes                        | yes                     |
| Year FE              | yes                     | yes                     | yes                        | yes                     |
| Observations         | 4844                    | 4844                    | 4839                       | 4839                    |
| Adjusted R-squared   | 0.196                   | 0.398                   | 0.260                      | 0.379                   |
| F                    | 31.97***                | 82.93***                | 45.78***                   | 76.75***                |

Note. Robust t-statistics (in parentheses) are based on the standard errors clustered by firms to address potential serial correlations in the residuals.

\*\*\* p<0.01,

\*\* p<0.05,

\* p<0.1.

<https://doi.org/10.1371/journal.pone.0300262.t011>

However, the foreign experience of the board of directors is also widespread; in particular, the board's primary role is to advise and supervise TMT members [113], which has been found to enhance the social performance of firms [85]. Thus, future research should explore the joint impact of returnee executives and directors on CSR. For instance, how and when does CEO duality (i.e., a firm's CEO and chairman are the same person) affect corporate social performance, which leads to different firm performance [114]?

Furthermore, this study focuses on the overall performance of CSR. The findings of this paper are not necessarily applicable to other social initiatives. Future research could investigate the direct and indirect effects of the breadth and width of executives' experiences abroad on, for example, corporate philanthropy [115], energy innovation [116], and environmental performance [117].

In addition, our sample is limited to Chinese-listed companies that voluntarily disclose CSR reports and are included in the RKS. While this focus allowed us to obtain authentic and reliable data on CSR performance, thus ensuring the credibility of our findings, our results may not be generalizable to other firms that are not listed or do not explicitly disclose their CSR reports. In addition, our study is based on the Chinese context. Although China is one of the largest emerging economies in the world, our findings may not be generalizable to other emerging economies. Therefore, a fruitful direction for future research would be to investigate whether our findings hold true for firms that do not explicitly disclose CSR reports and whether they can be replicated in other emerging economies.

## Supporting information

**S1 Table. Descriptive statistics of the executive-level data.**

(DOCX)

**S2 Table. MCTI rating system developed by RKS.**

(DOCX)

**S3 Table. Industry distribution of sample firms.**

(DOCX)

**S1 Data. Research data.**

(ZIP)

## Author Contributions

**Conceptualization:** Yunyu Wu, Hua Li.

**Data curation:** Yunyu Wu.

**Formal analysis:** Yunyu Wu.

**Funding acquisition:** Hua Li.

**Methodology:** Yunyu Wu, Hua Li.

**Project administration:** Weiguo Zhang.

**Software:** Yunyu Wu.

**Supervision:** Weiguo Zhang, Hua Li.

**Validation:** Weiguo Zhang.

**Writing – original draft:** Yunyu Wu.



Writing – review & editing: Yunyu Wu.

## References

1. Li HY, Zhang Y, Li Y, Zhou LA, Zhang WY. Returnees versus locals: Who perform better in China's technology entrepreneurship? *Strateg Entrep J*. 2012; 6(3):257–72. <https://doi.org/10.1002/sej.1139>
2. Qin F, Estrin S. Does social influence span time and space? Evidence from Indian returnee entrepreneurs. *Strateg Entrep J*. 2015; 9(3):226–42. <https://doi.org/10.1002/sej.1202>
3. Lin D, Lu J, Liu X, Zhang X. International knowledge brokerage and returnees' entrepreneurial decisions. *J Int Bus Stud*. 2016; 47(3):295–318. <https://doi.org/10.1057/jibs.2016.1>
4. Bai W, Johanson M, Martín Martín O. Knowledge and internationalization of returnee entrepreneurial firms. *Int Bus Rev*. 2017; 26(4):652–65. <https://doi.org/10.1016/j.ibusrev.2016.12.006>
5. Luo S, Lovely ME, Popp D. Intellectual returnees as drivers of indigenous innovation: Evidence from the Chinese photovoltaic industry. *World Econ*. 2017; 40(11):2424–54. <https://doi.org/10.1111/twec.12536>
6. Aguinis H. *Organizational responsibility: Doing good and doing well*. 2011.
7. Reimer M, Van Doorn S, Heyden MLM. Unpacking functional experience complementarities in senior leaders' influences on CSR strategy: A CEO-top management team approach. *J Bus Ethics*. 2018; 151(4):977–95. <https://doi.org/10.1007/s10551-017-3657-5>
8. Chin MK, Hambrick DC, Trevino LK. Political ideologies of CEOs: The influence of executives' values on corporate social responsibility. *Adm Sci Q*. 2013; 58(2):197–232. <https://doi.org/10.1177/0001839213486984>
9. Li W, Zhang R. Corporate social responsibility, ownership structure, and political interference: Evidence from China. *J Bus Ethics*. 2010; 96(4):631–45. <https://doi.org/10.1007/s10551-010-0488-z>
10. Gaiet C. Exploring the impact of legal systems and financial structure on corporate responsibility. *J Bus Ethics*. 2010; 95(2):195–222. <https://doi.org/10.1007/s10551-011-0854-5>
11. Yin J. Institutional drivers for corporate social responsibility in an emerging economy: A mixed-method study of Chinese business executives. *Bus Soc*. 2017; 56(5):672–704. <https://doi.org/10.1177/0007650315592856>
12. Zhang J, Kong D, Wu J. Doing good business by hiring directors with foreign experience. *J Bus Ethics*. 2018; 153(3):859–76. <https://doi.org/10.1007/s10551-016-3416-z>
13. Zhang YY, Dong LP. Foreign experience of CEO and corporate social responsibility: Evidence from China. *Front Environ Sci*. 2023; 11. <https://doi.org/10.3389/fenvs.2023.1103394>
14. Zheng J, Zhang L. Do venture capitalists with foreign experience drive corporate social responsibility better? Evidence from China. *Account Financ*. 2023; n/a(n/a). <https://doi.org/10.1111/acfi.13137>
15. Wen W, Song J. Can returnee managers promote CSR performance? Evidence from China. *Frontiers of Business Research in China*. 2017; 11(3). <https://doi.org/10.1186/s11782-017-0012-8>
16. Setiawan D, Brahmana RK, Asriharsari A, Maisaroh S. Does a foreign board improve corporate social responsibility? *Sustainability*. 2021; 13(20):11473.
17. Quan X, Ke Y, Qian Y, Zhang Y. CEO foreign experience and green innovation: Evidence from China. *J Bus Ethics*. 2023; 182(2):535–57. <https://doi.org/10.1007/s10551-021-04977-z>
18. Ullah F, Jiang P, Ntim CG, Shahab Y, Jiang X. Female directors' foreign experience and environmental and sustainable performance\*. *Asia-Pac J Financ Stud*. 2022; 51(2):169–93. <https://doi.org/10.1111/ajfs.12369>
19. Wang Y, Qiu Y, Luo Y. CEO foreign experience and corporate sustainable development: Evidence from China. *Bus Strateg Environ*. 2022; 31(5):2036–51. <https://doi.org/10.1002/bse.3006>
20. Zhang L, Xu Y, Chen H. Do returnee executives value corporate philanthropy? Evidence from China. *J Bus Ethics*. 2022; 179(2):411–30.
21. Hao Y, Fan C, Long Y, Pan J. The role of returnee executives in improving green innovation performance of Chinese manufacturing enterprises: Implications for sustainable development strategy. *Bus Strateg Environ*. 2019; 28(5):804–18. <https://doi.org/10.1002/bse.2282>
22. Godart FC, Maddux WW, Shipilov AV, Galinsky AD. Fashion with a foreign flair: Professional experiences abroad facilitate the creative innovations of organizations. *Acad Manage J*. 2015; 58:195–220. <https://doi.org/10.5465/AMJ.2012.0575>
23. Piaskowska D, Trojanowski G, Tharyan R, Ray S. Experience teaches slowly: Non-linear effects of top management teams' international experience on post-acquisition performance. *Br J Manage*. 2021. <https://doi.org/10.1111/1467-8551.12544>

24. Mohr A, Batsakis G. The contingent effect of TMT international experience on firms' internationalization speed. *Br J Manage*. 2019; 30(4):869–87. <https://doi.org/10.1111/1467-8551.12293>
25. Lewbel A. Using heteroscedasticity to identify and estimate mismeasured and endogenous regressor models. *J Bus Econ Stat*. 2012; 30(1):67–80. <https://doi.org/10.1080/07350015.2012.643126>
26. Le S, Kroll M. CEO international experience: Effects on strategic change and firm performance. *J Int Bus Stud*. 2017; 48(5):573–95. <https://doi.org/10.1057/s41267-017-0080-1>
27. Leung AK-y, Maddux WW, Galinsky AD, Chiu C-y. Multicultural experience enhances creativity: The when and how. *Am Psychol*. 2008; 63(3):169. <https://doi.org/10.1037/0003-066X.63.3.169> PMID: 18377107
28. Cappellen T, Janssens M. Career paths of global managers: Towards future research. *J World Bus*. 2005; 40(4):348–60. <https://doi.org/10.1016/j.jwb.2005.08.003>
29. Caligiuri P, Tarique I. Dynamic cross-cultural competencies and global leadership effectiveness. *J World Bus*. 2012; 47(4):612–22. <https://doi.org/10.1016/j.jwb.2012.01.014>
30. Slater DJ, Dixon-Fowler HR. CEO international assignment experience and corporate social performance. *J Bus Ethics*. 2009; 89(3):473–89. <https://doi.org/10.1007/s10551-008-0011-y>
31. Crowne KA. What leads to cultural intelligence? *Bus Horiz*. 2008; 51(5):391–9. <https://doi.org/10.1016/j.bushor.2008.03.010>
32. Sambharya RB. Foreign experience of top management teams and international diversification strategies of US multinational corporations. *Strateg Manage J*. 1996; 17(9):739–46. [https://doi.org/10.1002/\(sici\)1097-0266\(199611\)17:9<739::Aid-smj846>3.0.Co;2-k](https://doi.org/10.1002/(sici)1097-0266(199611)17:9<739::Aid-smj846>3.0.Co;2-k)
33. Maddux WW, Galinsky AD. Cultural borders and mental barriers: The relationship between living abroad and creativity. *J Pers Soc Psychol*. 2009; 96(5):1047. <https://doi.org/10.1037/a0014861> PMID: 19379035
34. Piaskowska D. When distance is good: An upper-echelons perspective on the role of distance in internationalization. *Distance in International Business: Concept, Cost and Value*: Emerald Publishing Limited; 2017.
35. Rodan S. Innovation and heterogeneous knowledge in managerial contact networks. *J Knowl Manag*. 2002; 6(2):152–63.
36. Carpenter MA, Sanders G, Gregersen HB. Bundling human capital with organizational context: The impact of international assignment experience on multinational firm performance and CEO pay. *Acad Manage J*. 2001; 44(3):493–511.
37. Cyert RM, March JG. *A behavioral theory of the firm*: Englewood Cliffs, NJ; 1963.
38. Boh WF, Slaughter SA, Espinosa JA. Learning from experience in software development: A multilevel analysis. *Manage Sci*. 2007; 53(8):1315–31. <https://doi.org/10.1287/mnsc.1060.0687>
39. Lai J-H, Chen L-Y, Song S. How outside directors' human and social capital create value for corporate international investments. *J World Bus*. 2019; 54(2):93–106. <https://doi.org/10.1016/j.jwb.2018.11.006>
40. Gick ML, Holyoak KJ. The cognitive basis of knowledge transfer. *Transfer of Learning*: Elsevier; 1987. p. 9–46.
41. Sanchez C, Dunning D. Overconfidence among beginners: Is a little learning a dangerous thing? *J Pers Soc Psychol*. 2018; 114(1):10–28. <https://doi.org/10.1037/pspa000102> PMID: 29094960
42. Park K-H, Byun J, Choi PMS. Managerial overconfidence, corporate social responsibility activities, and financial constraints. *Sustainability*. 2020; 12(1). <https://doi.org/10.3390/su12010061>
43. Tihanyi L, Ellstrand AE, Daily CM, Dalton DR. Composition of the top management team and firm international diversification. *J Manag*. 2000; 26(6):1157–77. <https://doi.org/10.1177/0149206300026006005>
44. Gary MS, Wood RE, Pillinger T. Enhancing mental models, analogical transfer, and performance in strategic decision making. *Strateg Manage J*. 2012; 33(11):1229–46. <https://doi.org/10.1002/smj.1979>
45. Gavetti G, Levinthal DA, Rivkin JW. Strategy making in novel and complex worlds: The power of analogy. *Strateg Manage J*. 2005; 26(8):691–712. <https://doi.org/10.1002/smj.475>
46. Grant RM. Toward a knowledge-based theory of the firm. *Strateg Manage J*. 1996; 17:109–22. <https://doi.org/10.1002/smj.4250171110>
47. Li S, Song X, Wu H. Political connection, ownership structure, and corporate philanthropy in China: A strategic-political perspective. *J Bus Ethics*. 2015; 129(2):399–411. <https://doi.org/10.1007/s10551-014-2167-y>
48. Li SX, Yao X, Sue-Chan C, Xi Y. Where do social ties come from: Institutional framework and governmental tie distribution among Chinese managers. *Manag Organ Rev*. 2011; 7(1):97–124. <https://doi.org/10.1111/j.1740-8784.2010.00187.x>

49. Fan JPH, Wong TJ, Zhang T. Politically connected CEOs, corporate governance, and Post-IPO performance of China's newly partially privatized firms. *J Financ Econ*. 2007; 84(2):330–57. <https://doi.org/10.1016/j.jfineco.2006.03.008>
50. Zhang J, Marquis C, Qiao K. Do political connections buffer firms from or bind firms to the government? A study of corporate charitable donations of Chinese firms. *Organ Sci*. 2016; 27(5):1307–24. <https://doi.org/10.1287/orsc.2016.1084>
51. Hillman AJ. Politicians on the board of directors: Do connections affect the bottom line? *J Manag*. 2005; 31(3):464–81. <https://doi.org/10.1177/0149206304272187>
52. Du J, Bai T, Chen S. Integrating corporate social and corporate political strategies: Performance implications and institutional contingencies in China. *J Bus Res*. 2019; 98:299–316. <https://doi.org/10.1016/j.jbusres.2019.02.014>
53. Xu S, Liu DC. Political connections and corporate social responsibility: Political incentives in China. *Bus Ethics*. 2020; 30. <https://doi.org/10.1111/beer.12308>
54. Lin D, Lu J, Liu X, Choi S-J. Returnee CEO and innovation in Chinese high-tech SMEs. *Int J Technol Manage*. 2014; 65(1–4):151–71. <https://doi.org/10.1504/ijtm.2014.060947>
55. Post JE, Murray EA Jr., Dickie RB, Mahon JF. The Public Affairs Function. *Calif Manage Rev*. 1983; 26(1):135–50. <https://doi.org/10.2307/41165055>
56. Jin HH, Qian YY, Weingast BR. Regional decentralization and fiscal incentives: Federalism, Chinese style. *J Public Econ*. 2005; 89(9–10):1719–42. <https://doi.org/10.1016/j.jpubeco.2004.11.008>
57. Chen Y, Wang SS, Li W, Sun Q, Tong WH. Institutional environment, firm ownership, and IPO first-day returns: Evidence from China. *J Corp Finan*. 2015; 32:150–68. <https://doi.org/10.1016/j.jcorpfin.2015.03.002>
58. Wang X, Hu L, Fan G. Marketization index of China's provinces: NERI report 2021: Social Sciences Academic Press(China); 2021.
59. Hambrick DC. Upper echelons theory: An update. *Acad Manage Rev*. 2007; 32(2):334–43.
60. Hambrick DC, Finkelstein S. Managerial discretion: A bridge between polar views of organizational outcomes. *Res Organ Beh*. 1987; 9:369–406.
61. Peteraf M, Reed R. Managerial discretion and internal alignment under regulatory constraints and change. *Strateg Manage J*. 2007; 28(11):1089–112. <https://doi.org/10.1002/smj.628>
62. Crossland C, Hambrick DC. How national systems differ in their constraints on corporate executives: A study of CEO effects in three countries. *Strateg Manage J*. 2007; 28(8):767–89. <https://doi.org/10.1002/smj.610>
63. Corwin ES, Loncarich H, Ridge JW. What's it like inside the hive? Managerial discretion drives TMT gender diversity of women-led firms. *J Manag*. 2022; 48(4):1003–34. <https://doi.org/10.1177/01492063211011755>
64. Wangrow DB, Schepker DJ, Barker VL, III. Managerial discretion: An empirical review and focus on future research directions. *J Manag*. 2015; 41(1):99–135. <https://doi.org/10.1177/0149206314554214>
65. Waddock SA, Graves SB. The corporate social performance-financial performance link. *Strateg Manage J*. 1997; 18(4):303–19.
66. Luo X, Wang H, Raihel S, Zheng Q. Corporate social performance, analyst stock recommendations, and firms future returns. *Strateg Manage J*. 2015; 36(1):123–36. <https://doi.org/10.1002/smj.2219>
67. Kong D, Cheng X, Jiang X. Effects of political promotion on local firms? Social responsibility in China. *Econ Modelling*. 2021; 95:418–29. <https://doi.org/10.1016/j.econmod.2020.03.009>
68. Li S, Lu JW. A dual-agency model of firm CSR in response to institutional pressure: Evidence from Chinese publicly listed firms. *Acad Manage J*. 2020; 63(6):2004–32. <https://doi.org/10.5465/amj.2018.0557>
69. Lau C, Lu Y, Liang Q. Corporate social responsibility in China: A corporate governance approach. *J Bus Ethics*. 2016; 136(1):73–87. <https://doi.org/10.1007/s10551-014-2513-0>
70. Marquis C, Qian C. Corporate social responsibility reporting in China: Symbol or substance? *Organ Sci*. 2014; 25(1):127–48. <https://doi.org/10.1287/orsc.2013.0837>
71. Luo XR, Wang D, Zhang J. Whose call to answer: Institutional complexity and firms' CSR reporting. *Acad Manage J*. 2017; 60(1):321–44. <https://doi.org/10.5465/amj.2014.0847>
72. Wang Z, Reimsbach D, Braam G. Political embeddedness and the diffusion of corporate social responsibility practices in China: A trade-off between financial and CSR performance? *J Clean Prod*. 2018; 198:1185–97. <https://doi.org/10.1016/j.jclepro.2018.07.116>
73. Bai C-E, Lu J, Tao Z. The multitask theory of state enterprise reform: Empirical evidence from China. *Am Econ Rev*. 2006; 96(2):353–7. <https://doi.org/10.1257/000282806777212125>

74. Cai H, Treisman D. Did government decentralization cause China's economic miracle? *World Polit.* 2006; 58(4):505–35.
75. Li J, Meyer KE, Zhang H, Ding Y. Diplomatic and corporate networks: Bridges to foreign locations. *J Int Bus Stud.* 2018; 49(6):659–83. <https://doi.org/10.1057/s41267-017-0098-4>
76. Ma X, Ding Z, Yuan L. Subnational institutions, political capital, and the internationalization of entrepreneurial firms in emerging economies. *J World Bus.* 2016; 51(5):843–54. <https://doi.org/10.1016/j.jwb.2016.07.004>
77. Haveman HA, Jia N, Shi J, Wang Y. The dynamics of political embeddedness in China. *Adm Sci Q.* 2017; 62(1):67–104. <https://doi.org/10.1177/0001839216657311>
78. Ntim CG, Soobaroyen T. Corporate governance and performance in socially responsible corporations: New empirical insights from a Neo-Institutional framework. *Corp Gov.* 2013; 21(5):468–94. <https://doi.org/10.1111/corg.12026>
79. Ryan TP. *Modern regression methods*: John Wiley & Sons; 2008.
80. Sun JD, Ji Z, Wang C, Wang XC. State ownership, institutional development, and corporate philanthropic giving: An integrated view of legitimacy-efficiency trade-offs. *Ekon Istraz.* 2021; 34(1):608–27. <https://doi.org/10.1080/1331677x.2020.1802322>
81. Cui L, Li Y, Meyer KE, Li Z. Leadership experience meets ownership structure: Returnee managers and internationalization of emerging economy firms. *Manag Int Rev.* 2015; 55(3):355–87. <https://doi.org/10.1007/s11575-014-0221-8>
82. Luo J, Wang L. Does managerial foreign experience deter corporate fraud? *Emerg Mark Financ Trade.* 2022; 58(2):342–64. <https://doi.org/10.1080/1540496x.2021.1973424>
83. Miska C, Witt MA, Stahl GK. Drivers of global CSR integration and local CSR responsiveness: Evidence from Chinese MNEs. *Bus Ethics Quart.* 2016; 26(3):317–45. <https://doi.org/10.1017/beq.2016.13>
84. Chen W, Zhu YF, Wang CY. Executives' overseas background and corporate green innovation. *Corp Soc Responsib Environ Manag.* 2023; 30(1):165–79. <https://doi.org/10.1002/csr.2345>
85. Luo J, Chen D, Chen J, editors. *Coming back & giving back: Returnee directors and corporate donations*. Academy of Management Proceedings; 2016: Academy of Management Briarcliff Manor, NY 10510.
86. Brammer S, Millington A. Firm size, organizational visibility and corporate philanthropy: An empirical analysis. *Bus Ethics.* 2006; 15(1):6–18.
87. Adams M, Hardwick P. An analysis of corporate donations: United Kingdom evidence. *J Manage Stud.* 1998; 35(5):641–54. <https://doi.org/10.1111/1467-6486.00113>
88. Sobel ME. Asymptotic confidence intervals for indirect effects in structural equation models. *Sociol Methodol.* 1982; 13:290–312. <https://doi.org/10.2307/270723>
89. Hayes AF, Preacher KJ. Statistical mediation analysis with a multicategorical independent variable. *Br J Math Stat Psychol.* 2014; 67(3):451–70. <https://doi.org/10.1111/bmsp.12028> PMID: 24188158
90. Preacher KJ, Rucker DD, Hayes AF. Addressing moderated mediation hypotheses: Theory, methods, and prescriptions. *Multivariate Behav Res.* 2007; 42(1):185–227. <https://doi.org/10.1080/00273170701341316> PMID: 26821081
91. Preacher KJ, Hayes AF. Asymptotic and resampling strategies for assessing and comparing indirect effects in multiple mediator models. *Behav Res Methods.* 2008; 40(3):879–91. <https://doi.org/10.3758/brm.40.3.879> PMID: 18697684
92. Chen W, Zhu Y, He Z, Yang Y. The effect of local government debt on green innovation: Evidence from Chinese listed companies. *Pacific-Basin Finance J.* 2022; 73. <https://doi.org/10.1016/j.pacfin.2022.101760>
93. Li D, Huang M, Ren S, Chen X, Ning L. Environmental legitimacy, green innovation, and corporate carbon disclosure: Evidence from CDP China 100. *J Bus Ethics.* 2018; 150(4):1089–104. <https://doi.org/10.1007/s10551-016-3187-6>
94. Lin JYF, Liu ZQ. Fiscal decentralization and economic growth in China. *Econ Devel Cult Change.* 2000; 49(1):1–21. <https://doi.org/10.1086/452488>
95. Li HB, Zhou LA. Political turnover and economic performance: The incentive role of personnel control in China. *J Public Econ.* 2005; 89(9–10):1743–62. <https://doi.org/10.1016/j.jpubeco.2004.06.009>
96. See G. Harmonious society and Chinese CSR: Is there really a link? *J Bus Ethics.* 2009; 89(1):1–22. <https://doi.org/10.1007/s10551-008-9981-z>
97. Zhao M, Tan J, Park SH. From voids to sophistication: Institutional environment and MNC CSR crisis in emerging markets. *J Bus Ethics.* 2014; 122(4):655–74. <https://doi.org/10.1007/s10551-013-1751-x>

98. Matten D, Moon J. "Implicit" and "Explicit" CSR: A conceptual framework for a comparative understanding of corporate social responsibility. *Acad Manage Rev.* 2008; 33(02):404–24.
99. Campbell JL. Institutional analysis and the paradox of corporate social responsibility. *Am Behav Sci.* 2005; 49(7):925–38. <https://doi.org/10.1177/0002764205285172>
100. Campbell JL. Why would corporations behave in socially responsible ways? An institutional theory of corporate social responsibility. *Acad Manage Rev.* 2007; 32(3):946–67. <https://doi.org/10.5465/AMR.2007.25275684>
101. Mohammad S, Husted BW. Law-abiding organizational climates in developing countries: The role of institutional factors and socially responsible organizational practices. *Bus Ethics.* 2019; 28(4):476–93. <https://doi.org/10.1111/beer.12228>
102. Faller CM, Knyphausen-Aufsess DZ. Does equity ownership matter for corporate social responsibility? A literature review of theories and recent empirical findings. *J Bus Ethics.* 2018; 150(1):15–40. <https://doi.org/10.1007/s10551-016-3122-x>
103. McGuinness PB, Vieito JP, Wang MZ. The role of board gender and foreign ownership in the CSR performance of Chinese listed firms. *J Corp Finan.* 2017; 42:75–99. <https://doi.org/10.1016/j.jcorpfin.2016.11.001>
104. Hu KH, Lin SJ, Hsu MF. A fusion approach for exploring the key factors of corporate governance on corporate social responsibility performance. *Sustainability.* 2018; 10(5). <https://doi.org/10.3390/su10051582>
105. Oh W-Y, Chang YK, Cheng Z. When CEO career horizon problems matter for corporate social responsibility: The moderating roles of industry-level discretion and blockholder ownership. *J Bus Ethics.* 2016; 133(2):279–91. <https://doi.org/10.1007/s10551-014-2397-z>
106. Huang SK. The impact of CEO characteristics on corporate sustainable development. *Corp Soc Responsib Environ Manag.* 2013; 20(4):234–44. <https://doi.org/10.1002/csr.1295>
107. Kim KH, Kim M, Qian C. Effects of corporate social responsibility on corporate financial performance: A competitive-action perspective. *J Manag.* 2018; 44(3):1097–118. <https://doi.org/10.1177/0149206315602530>
108. D'Amato A, Falivena C. Corporate social responsibility and firm value: Do firm size and age matter? Empirical evidence from European listed companies. *Corp Soc Responsib Environ Manag.* 2020; 27(2):909–24. <https://doi.org/10.1002/csr.1855>
109. Han Q, Jennings JE, Liu R, Jennings PD. Going home and helping out? Returnees as propagators of CSR in an emerging economy. *J Int Bus Stud.* 2019; 50(6):857–72. <https://doi.org/10.1057/s41267-018-00210-8>
110. Wen W, Cui H, Ke Y. Directors with foreign experience and corporate tax avoidance. *J Corp Finan.* 2020; 62. <https://doi.org/10.1016/j.jcorpfin.2020.101624>
111. Xie Z, Wang L. Returnee managers as an asset for emerging market multinational enterprises: Chinese cross-border acquisitions (2008–2017). *J World Bus.* 2022; 57(2). <https://doi.org/10.1016/j.jwb.2021.101270>
112. Tzeng C-H. How foreign knowledge spillovers by returnee managers occur at domestic firms: An institutional theory perspective. *Int Bus Rev.* 2018; 27(3):625–41. <https://doi.org/10.1016/j.ibusrev.2017.10.011>
113. Weck MK, Veltrop DB, Oehmichen J, Rink F. Why and when female directors are less engaged in their board duties: An interface perspective. *Long Range Plann.* 2022; 55(3). <https://doi.org/10.1016/j.lrp.2021.102123>
114. Ali S, Naseem MA, Jiang J, Rehman RU, Malik F, Ahmad MI. "How" and "When" CEO duality matter? Case of a developing economy. *SAGE Open.* 2022; 12(3):21582440221116113. <https://doi.org/10.1177/21582440221116113>
115. Zhong M, Zhao W, Shahab Y. The philanthropic response of substantive and symbolic corporate social responsibility strategies to COVID-19 crisis: Evidence from China. *Corp Soc Responsib Environ Manag.* 2022; 29(2):339–55. <https://doi.org/10.1002/csr.2204> PMID: 35465450
116. Ali S, Jiang J, Hassan ST, Shah AA. Revolution of nuclear energy efficiency, economic complexity, air transportation and industrial improvement on environmental footprint cost: A novel dynamic simulation approach. *Nucl Eng Technol.* 2022; 54(10):3682–94. <https://doi.org/10.1016/j.net.2022.05.022>
117. Kit Pun F. Determinants of environmentally responsible operations: A review. *Int J Qual Reliab Manag.* 2006; 23(3):279–97. <https://doi.org/10.1108/02656710610648233>
